# 1 **3D-Cardiomics: A spatial transcriptional atlas of the mammalian** 2 **heart**

3  
4 Monika Mohenska<sup>1,2,3,12</sup>, Nathalia M. Tan<sup>1,2,3,12</sup>, Alex Tokolyi<sup>3,12</sup>, Milena B. Furtado<sup>3,4</sup>, Mauro W. Costa<sup>3,4</sup>,  
5 Andrew J. Perry<sup>5</sup>, Jessica Hatwell-Humble<sup>3,6</sup>, Karel van Duijvenboden<sup>7</sup>, Hieu T. Nim<sup>3,8</sup>, Susan K.  
6 Nilsson<sup>3,6</sup>, David R. Powell<sup>5</sup>, Nadia A. Rosenthal<sup>3,4,9</sup>, Fernando J. Rossello<sup>\*1,2,3,11</sup>, Mirana Ramialison<sup>\*3,10,13</sup>,  
7 and Jose M. Polo<sup>\*1,2,3,13</sup>

8  
9 1 Department of Anatomy and Developmental Biology, Monash University, Wellington  
10 Road, Clayton, Victoria, Australia.

11 2 Development and Stem Cells Program, Monash Biomedicine Discovery Institute,  
12 Wellington Road, Clayton, Victoria, Australia.

13 3 Australian Regenerative Medicine Institute, Monash University, Wellington Road,  
14 Clayton, Victoria, Australia

15 4 The Jackson Laboratory, Bar Harbor, ME, USA

16 5 Monash Bioinformatics Platform, Monash University, Wellington Road, Clayton,  
17 Victoria, Australia

18 6 Biomedical Manufacturing, CSIRO Manufacturing, Bag 10, Clayton South, Australia

19 7 Department of Medical Biology, Academic Medical Centre, Amsterdam, The  
20 Netherlands

21 8 Faculty of Information Technology, Monash University, Clayton, Victoria, Australia

22 9 National Heart and Lung Institute, Imperial College London, London, United Kingdom

23 10 Systems Biology Institute Australia, Clayton, Victoria, Australia

24 11 University of Melbourne Centre for Cancer Research, University of Melbourne, Melbourne,  
25 Victoria, Australia

26 12 Equal Contribution

27 13 Equal senior author

28

29 \*Correspondence: [mirana.ramialison@monash.edu](mailto:mirana.ramialison@monash.edu) (M.R.)

30 \*Correspondence: [jose.polo@monash.edu](mailto:jose.polo@monash.edu) (J.M.P.)

31 \*Correspondence: [frossello@unimelb.edu](mailto:frossello@unimelb.edu) (F.J.R.)

## 32 Abstract

33 Understanding spatial gene expression and regulation is key to uncovering developmental and  
34 physiological processes, during homeostasis and disease. Numerous techniques exist to gain gene  
35 expression and regulation information, but very few utilise intuitive true-to-life three-dimensional  
36 representations to analyze and visualize results. Here we combined spatial transcriptomics with 3D  
37 modelling to represent and interrogate, transcriptome-wide, three-dimensional gene expression and  
38 location in the mouse adult heart. Our study has unveiled specific subsets of genes that display  
39 complex spatial expression in organ sub-compartments. Also, we created a web-based user interface  
40 for spatial transcriptome analysis and visualization. The application may be accessed from [http://3d-](http://3d-cardiomics.erc.monash.edu/)  
41 [cardiomics.erc.monash.edu/](http://3d-cardiomics.erc.monash.edu/).

## 42 Keywords

43 Cardiac model, spatial transcriptomics, cardiac systems, bioinformatics, systems biology, 3D organ,  
44 data visualization

45

46

47

48

49

50

## 51 Introduction

52 Organs or complex systems display a precise cellular spatial organisation which, if disrupted, can lead  
53 to functional changes and, eventually, disease. The mammalian heart is a complex organ composed of  
54 four structurally and functionally distinct chambers: left and right ventricles and atria (Moorman &  
55 Christoffels 2003), connected to the circulatory system through major vessels. It is composed of  
56 different cellular layers including cells types such as cardiomyocytes, fibroblasts, endothelial and  
57 immune cells (Massaia et al. 2018). This complex architecture ensures a plethora of functions such as  
58 contraction, electrical current conduction, blood and lymph circulation, and immune response.  
59 Different regions and structures of the heart exert different functions, hence molecular and  
60 physiological properties vary within the heart. For instance, intracardiac pressure is the highest within  
61 the left ventricle, which has the thickest muscular wall in the heart, to ensure blood distribution in the  
62 body. In contrast, the right atrium displays thin wall chambers as it only pumps blood to the lungs.  
63 Any anatomical or physiological alterations to these sub-compartments will impair cardiac function.  
64 For example, Hypoplastic Left Heart (Siffel et al. 2015), characterised by an atrophic or absent left  
65 ventricle, or transposition of the Great Arteries (Garne et al. 2007), manifested by an inversion of the  
66 connection of the pulmonary artery and aorta to the heart, are severe forms of cardiac malformations  
67 that require invasive surgery in the first years of life and can lead to death.  
68 Our understanding of which genes are responsible for the formation and maintenance of specific  
69 cardiac sub-compartments is still limited. Thus knowledge of structure-specific gene expression is  
70 key if we want to address this. The importance of spatio-temporal gene expression and regulation in  
71 the heart has been well appreciated for decades (Waardenberg et al. 2014). Techniques such as *in*  
72 *situ* hybridization or immunohistochemistry have shed light on the function of several genes in  
73 specific structures of the heart. However, this can only be done in a biased way and one or two genes  
74 at a time. In the last few years, different technologies to resolve spatial genome-wide expression in a  
75 systematic manner in whole organs or organism have emerged. For instance, spatial transcriptomics  
76 allows to interrogate gene wide expression in histological sections (Ståhl et al. 2016) (Asp et al. 2017)  
77 (X. Wang et al. 2018) as well as Slide-seq (Rodrigues et al. 2019) and spatially barcoded arrays (Asp

78 et al. 2017). DVEX (Karaiskos et al. 2017), Tomo-seq (Junker et al. 2014) and Geo-seq (Chen et al.  
79 2017) have also been developed to capture different degrees of spatial resolution of gene expression  
80 in three dimensions. Recently, Burkhard and Bakkers utilised Tomo-seq to map the spatial  
81 transcriptome of the embryonic heart (Burkhard & Bakkers 2018). Although these techniques have  
82 enhanced our ability to determine and explore the spatial transcriptome of some model organisms and  
83 tissues, they have mostly been restricted to the size of the studied tissue, organ or organism.  
84 Consequently, to date, none of these methods have systematically investigated gene expression in 3D  
85 in adult mammalian hearts.

86

87 Here we present 3D-cardiomics, a three-dimensional gene expression atlas of the murine adult heart  
88 generated from RNA-sequencing of 18 anatomical sections. Analysis of this dataset revealed regional  
89 synexpression groups, including known cardiac-markers and novel compartment-specific genes. In  
90 addition, we present a novel visualization interface that facilitates interactive gene expression  
91 navigation, synexpression analysis and differential gene expression across sections. Our study  
92 provides a unique framework to explore gene expression in an adult mouse heart where information is  
93 scarce, and enables the identification of spatially-restricted genes at an unprecedented resolution.

94

## 95 Results

### 96 Revealing the spatial transcriptional profile of the murine adult heart

97 We aimed to evaluate the spatial transcriptional profile of the adult mouse heart. To achieve this,  
98 mouse hearts were isolated and microdissected in 18 anatomical sections. Microdissection of the heart  
99 consisted first in splitting the major vessels, atria and ventricles (Figure 1A). Three equally spaced  
100 transverse dissections were then performed on the ventricle, followed by further longitudinal  
101 dissections of the ventricles. High-throughput whole transcriptome sequencing (RNA-seq) was  
102 performed in duplicates for each of the 18 sections. Replicates highly correlate (Figure S1A)

103 following batch effect removal (Figures S1B,C). In parallel, a 3D *in silico* model of the mouse heart  
104 ([de Boer et al. 2011](#)) , ([Aanhaanen et al. 2010](#)) was digitally partitioned (Figure 1B) mimicking the 18  
105 sections of the microdissected hearts (Figure 1C). RNA-sequencing data from each anatomical section  
106 was then mapped to its respective 3D partition. The software package Unity [<https://unity.com/>] was  
107 chosen to build the 3D-cardiomics tool due to its capabilities in operating 3D models. RNA  
108 expression values of the 18 pieces for each gene were mapped as colours on to the 18 virtual heart  
109 pieces previously dissected in silico. This allowed us to generate a digital transcriptome map of the  
110 composing sections of the adult mouse heart, explorable in three-dimensions, which we used to  
111 investigate spatial transcriptional networks within the heart.

112

### 113 Unravelling the structural transcriptome of the adult mouse heart

114 To gain insight into the spatial distribution of gene expression in the adult mouse heart, we examined  
115 how distinct cardiac sections clustered in low dimensional space. Correspondence analysis (CoA)  
116 revealed that the atria and major vessels diverged from the ventricular sections in the first two  
117 components (Figure 2A). The top 500 most variable genes of the first two components of the CoA  
118 explained most of the variability found between the cardiac sections and were associated with higher  
119 expression in either the atria or major vessels (Figure 2A). Investigation of variance explained by all  
120 components of the CoA revealed that most of the variability (62%) was explained by the first  
121 component if all sections were included in the analysis (Figure S2A). In contrast, the first component  
122 contributes only to 26% of the variance when only ventricular sections were analyzed (Figure S2B).  
123 To further explore the differences between the superior and inferior sections of the heart, we  
124 performed differential gene expression (DGE) analysis across the 18 sections, which confirmed the  
125 clustering of atrial and great vessel sections separately from the ventricular sections (Figure 2B). This  
126 is in accordance with the divergence observed from the CoA (Figure 2A). In order to spatially  
127 visualize the molecular segregation highlighted by the CoA and the DGE analysis, representative  
128 genes of each quadrant (Figure 2A) and cluster (Figure 2B) were visualized on our 3D *in silico* model

129 (Figure 2C). The visualizations confirmed that the spatial spread of genes correlated with the spatial  
130 spread of sections in the first two dimensions of the CoA. A gradient across the second dimension was  
131 present which had separated the vessels from the atria. For instance, unbiasedly identified, *Tat* and  
132 *Uts2b* were highly expressed in the atria; *Bmp3* and *Gata5* have variable expression between the atria;  
133 *Adipoq* and *Pon1* are highly expressed in the major vessels. A noticeable gradient throughout the first  
134 dimension of the CoA, showed that the ventricles segregated from the superior tissues of the heart.  
135 The genes characterising the ventricles include *Irx1* and *Myl3* (Figure 2C). Some of these genes have  
136 been previously characterised in the specified sub-compartments, whilst others are novel candidate  
137 markers ([Motoki et al. 2009](#)) ([Yue et al. 2017](#)) ([Gu et al. 2012](#)), ([Tward et al. 2002](#)), ([Shih et al.](#)  
138 [1998](#)), ([Patel et al. 2008](#)), ([Andersen et al. 2012](#)), ([Zhi et al. 2016](#)). Altogether, these findings  
139 confirmed that major spatial gene expression differences in the heart correlate with chamber identity.  
140

141 To uncover global synexpression groups beyond these representative gene expression patterns, we  
142 performed unbiased soft clustering and 3D visualization across the heart (Figure 2D). The analysis  
143 revealed 15 clusters of which 10 had specific enrichment of gene expression localised to one  
144 anatomical compartment (*e.g.*: expression pattern restricted to vessels; atria; left or right ventricles).  
145 Interestingly, 5 clusters contained gene sets with complex expression patterns across anatomical  
146 sections (*e.g.*: expression pattern observed in atria, vessels and ventricular septum; atria and right  
147 ventricle) (Figure 2D). These novel synexpression groups indicate complex molecular functions  
148 shared across anatomical compartments (Table S2). Genes that are not spatially restricted (*i.e.*: highest  
149 probability of belonging to a cluster is less than 0.7) were clustered together (Figure S2C) and the  
150 observed average standardised expression was across all sections. Gene ontology (GO) analysis of  
151 these gene sets identified enrichment of cellular maintenance processes, supporting the role of this  
152 broadly expressed synexpression group in basic cellular functions (Figure S2D).

153

154 In summary, expected patterns of gene regulation in the murine heart were captured in our study and  
155 novel patterns were also revealed.

156

## 157 Deciphering gene expression profiles of the atria

158 We next investigated the spatio-transcriptional changes amongst the atrial sections. Three of the  
159 previously identified 15 clusters revealed subsets of genes which were either up- (cluster 11, cluster 4)  
160 or down-regulated (cluster 9) in the atria relative to the rest of the cardiac sections (Figure  
161 3A). Genes belonging to cluster 11 were found to be enriched in biological processes relating to  
162 extracellular structure, and those of cluster 4 were enriched in biological functions relating to  
163 cardiovascular development and GTPase mediated signal transduction. Unsurprisingly genes of the  
164 cluster associated to high gene expression in the ventricles was enriched in metabolic processes and  
165 mitochondrial function (Figure 3B). The distinct atrial specific expression is represented by known  
166 atrial markers (*e.g.*: *Myl4*, *Myl7* ([Orr et al. 2016](#)), ([Huang et al. 2003](#))) and novel ones (*e.g.*: *Eps8*,  
167 *Usp11*), whereas *Myl2* and *Adra1a* are respectively known and unknown markers showing ventricular  
168 specific expression patterns (Figure 3C). We further validated *Myl4* in silico expression gene patterns  
169 by RNAScope *in situ* hybridization (Figure 3D). As expected, *Myl4* displayed high expression in both  
170 atria. We have also shown the DAPI negative control (Figure S2E), as well as an RNAScope *in situ*  
171 hybridization of *Ubc*, a highly expressed cardiac marker discovered in our analysis (Figure 3E, Figure  
172 2SF) to confirm our findings. We also validated the expression of the cluster 9 gene *Adra1a*, and  
173 confirmed the transcript was restricted to ventricles (Figure S2H-I). Even though the relative  
174 expression of *Adra1a* was low, higher expression was still observed in ventricle, which demonstrated  
175 the sensitivity of our analysis.

176

177 We then investigated gene expression differences between the left and the right atria. No specific  
178 synexpression groups from the soft-clustering could capture differences between the atria. Thus, we  
179 performed a supervised DGE analysis between the left and right atria, and identified markers for each  
180 atrium (Figure 3E). The left atrium was characterised by known markers such as left cardiac lineage  
181 marker *Pitx2* ([Campione et al. 2001](#)) and the right atrium by the sinoatrial node transcription factor

182 *Tbx3* ([Hoogaars et al. 2007](#)) (Figure 3F). Consistent with this, KEGG pathway analysis of the  
183 identified DGE revealed enrichment of TGF-beta signalling, neuroactive ligand-receptor interaction  
184 and calcium signalling pathways in the right atrium (Figure S2F). In addition, comparative analysis of  
185 the molecular functions differentially recruited between the left or the right atrium suggested that  
186 extracellular matrix (ECM) functions (driven by well-known ECM components such as *Hmcn2*,  
187 *Adamts8*) are highly enriched in the left atrium (Figure 3G). In contrast, cytokine binding and channel  
188 activity was enriched in the right atrium (exemplified by markers such as *Lepr*, *Kcnc2*, *Hcn4*).  
189 Collectively, our findings provide insight into the specific transcriptional attributes of the atria where  
190 major expression differences pertain to the pacemaker functions restricted to the right atrium.

191

## 192 Transcriptional complexity within the ventricles

193 In order to examine gene expression differences within the ventricular regions, we performed CoA on  
194 the ventricular sections exclusively (Figure 4A). Distribution of the section within the first two  
195 components revealed a tight clustering of the left ventricular sections away from the right ventricular  
196 sections, with the exception of the right, apical ventricular section (RV\_E), which clustered closer to  
197 the LV sections. Soft clustering confirmed this distribution and identified two clusters containing  
198 genes which were highly expressed in the left ventricle (Figures 4B,C; clusters 15 and 7) and one  
199 cluster (Cluster 10) containing genes with higher expression in the right ventricle (Figure 4D). The  
200 CoA analysis also allowed us to determine which genes caused most of the variability in the ventricles  
201 (Figure 4A). These include *Nppb*, *Efr3b*, *Brca1*, *Nrn1*, *Ces2e* and *Plekhh1* as enriched in the left  
202 ventricle and *Itga2b*, *Ngp* and *Tubb1* in the right ventricle (Figure 4E). Furthermore, as validation, we  
203 performed RNAscope *in situ* hybridization of *Nppb* expression (Figure S2K). Supervised DGE  
204 analysis between the left and right ventricular segments confirmed the findings using clustering  
205 analysis (Figure 4F). Indeed, we found a similar pattern of separation with the cardiac sections when  
206 we conducted hierarchical clustering using the genes with the highest log fold changes from our DGE  
207 analysis (Figure 4F). The genes with the highest log fold changes are common to the top genes from



208 our CoA and soft cluster analysis, such as, *Itga2b*, *Tubb1*, *Nppb*, and *Plekhh1*. Intriguingly, we found  
209 that the top genes of the right ventricle regulate processes such as wound healing and blood  
210 coagulation (Table S1).

211

212 To further delve into the transcriptional complexity of the ventricles, we investigated additional  
213 sources of variation within the dataset. For this, we examined components 5 and 6 of the ventricular  
214 sections in the CoA (Figure 5A). We identified three clustered groups of sections corresponding to a  
215 unique spatial transcriptional pattern. These revealed that the inferior sections of the right ventricle  
216 (RV\_C, RV\_D, RV\_E) segregate with the superior sections of the left ventricle (LVA\_B, LVP\_B,  
217 LVL\_B). On the other hand, the superior section of the right ventricle (RV\_B) clusters together with  
218 the remaining ventricular sections. The inferior section of the septum (LVC\_D) surprisingly  
219 segregates away from both groups (Figure 5A). We then performed c-means clustering to further  
220 study these differences, which also revealed two similar clusters of complex patterns of gene  
221 expression across the two ventricles (Figures 5B). Interestingly both clusters show the inferior portion  
222 of the septum (LVC-D) to have very low gene expression in contrast to its neighbouring sections.  
223 This analysis provides a novel appreciation of the molecular differences within the two ventricles.

224

## 225 Prediction of non-myocyte localization within the heart

226 The novel spatial patterns discovered in this study lead us to investigate whether the molecular  
227 differences between the organ sub-compartments are due to their different functions and cell  
228 compositions. In order to address this, we mined the cell-specific markers unbiasedly identified by  
229 [\(Skelly et al. 2018\)](#) using their single cell analysis of the ventricles. We used the mean expression of  
230 markers from each cell type across all ventricular sections to generate a cell signature that we then  
231 superimposed in our 3D model. This in turn allowed us to locate where each cell type was most likely  
232 to be present in the ventricular sections and revealed that cell types are uniformly distributed across  
233 sections (Figure S2H). To further appreciate the spatial restrictions of different cardiac cellular

234 subtypes in our 3D digital map, we repeated this procedure for the whole heart, performed  
235 hierarchical clustering and visualized the predicted locations of cell types within the heart (Figure  
236 5E). Our analysis confirmed spatial enrichment of distinct cell-types in specific areas of the heart. For  
237 example, the spatial profiles of the two fibroblast subtypes differ from each other. Markers of  
238 fibroblasts type 2 display restricted expression in the vessels and atria, whereas fibroblasts type 1 are  
239 more widely distributed in heart. The most similar spatial expression profiles between two cell types  
240 are those of pericytes and endothelial cells, and of fibroblast 1 and macrophages. The novel spatial  
241 patterns of transcription identified, provide an insight into potentially new structural understanding of  
242 the organ.

243

244 3D-Cardiomics online tool allows for visualization of gene expression and  
245 differential gene expression analysis

246 In order to make the transcriptome analysis and visualization of the 3D model accessible to a wider  
247 audience, we created an online user interface which allows for further exploration of the data (Figure  
248 6). The online tool includes features such as the interactive 3D heart, gene search and visualization,  
249 clusters from this study, and DGE analysis features (Figure 6A). In addition, a custom set of genes  
250 may be uploaded (for example single-cell markers), and the system will in turn extract a gene  
251 expression signature by performing an averaged expression of those genes for each section across the  
252 entire heart. The 3D model can be rotated or expanded for the examination of spatial patterns of gene  
253 expression (Figure 6B). The right panel displays this information for the current gene, sorted by the  
254 absolute descending value of the Pearson coefficient of determination (expressed as a percentage),  
255 giving the user genes which have RNA expression levels most correlated and inversely correlated  
256 with their current gene of interest (Figure 6C), allowing the identification of synexpression groups.  
257 For the first time, a 3D interface for exploring spatial gene expression offers real time differential  
258 gene expression analysis. Comparisons between any two sets of cardiac sections can be performed  
259 “on-the-go” and directly visualized by the “Piecewise Comparison” panel of 3D-cardiomics. Selecting

260 “Compare” allows the input of the first set (which may include more than one sub-compartment),  
261 which can be selected by clicking on the model (Figure 6D). Finally, data can be visualized using two  
262 colour modes (Figure 6E) facilitating the website accessibility. In summary, our tool offers an ease of  
263 analysis and visualization of the adult mouse transcriptome, which could be applicable to any other  
264 organ or tissue 3D model.

265

## 266 Discussion

267 Our study presents a novel way to integrate high-throughput data on a three-dimensional model for  
268 analysis. We have demonstrated an alternative and beneficial method for data visualization of gene  
269 expression data in 3D of an organ, alongside conventional approaches. For example, in our soft  
270 cluster analysis, we have provided the standardised gene expression line graphs concurrent to the  
271 cluster expression means visualized on the 3D heart. Similarly we have also provided the localisation  
272 predictions of numerous cell types in both the 3D model and via a heatmap. In both of these cases,  
273 the contrasting expression profiles between the clusters, or the different cell types is evident in both  
274 visualization approaches, however, the 3D heart poses as a more intuitive form for visualization in the  
275 complex spatial context.

276 The online tool we have created is advantageous, as expression profiles of sufficiently expressed  
277 genes or groups of genes in the heart can be visualized, as well as corresponding correlated genes.  
278 Additionally, our tool effortlessly allows for differential gene expression analysis, and visualization.  
279 Furthermore, the easily accessible tool can be freely used for visualization and analysis of cardiac  
280 related gene expression, which is beneficial for hypothesis building and uncovering of new roles of  
281 gene expression in the mammalian heart.

282

283 Our spatial transcriptomic approach allowed us to show that most of the variability between the  
284 cardiac sections is due to the difference between the atria, major vessels and ventricles. In the major  
285 vessels, we found enrichment of genes functionally associated with metabolism. For instance, we

286 found *Pon1*, a gene known to be associated with atheroprotective effects and regulation of  
287 cardiovascular disease (Tward et al. 2002), (Shih et al. 1998). Similarly, *Adipoq*, which is also known  
288 to affect the artery intima media thickness (Patel et al. 2008), displays high expression in the major  
289 vessels. In conjunction with our findings, *Adipoq* is also present in aortic endothelial cells (Komura et  
290 al. 2013), hence this three-dimensional model serves well for hypothesis testing of other potentially  
291 present proteins previously not associated with any of the cardiac sub-components. We also  
292 uncovered known and unknown markers for the atria and ventricles, such as *Myl4* or *Myl3*  
293 respectively (Gudbjartsson et al. 2017) (Peng et al. 2017) (Orr et al. 2016). *Myl3* has been known to  
294 be associated with all sub-compartments of the heart, however the degree of differential expression  
295 across compartments had been masked by the lack of spatial information (T. Y. Wang et al. 2018).  
296 Differential gene expression analysis between left and right atria revealed enrichment of *Tbx3*  
297 expression in the right atrium, a crucial transcription factor governing the establishment of the  
298 sinoatrial node, also located in the right atrium. Not surprising, the most distinct ventricular pattern  
299 was between the left and the right chambers. The left ventricle was found to be enriched in functions  
300 associated to muscle regulatory processes such as higher respiratory and muscle activity which is  
301 concordant to previous research, as the left ventricle is required to supply blood to the entirety of an  
302 organism. In contrast, the right ventricle pumps blood through, to the pulmonary vasculature, and only  
303 with about 25% of the stroke work of the left ventricle (Sordahl 1976) (Voelkel et al. 2006).

304

305 Beyond these major differences between atria and ventricles, we identified a unique set of spatial gene  
306 expression signatures. We hypothesised that the cellular composition between the sub-compartments  
307 contribute to the observed differences. To aid in our understating of the dominant cellular  
308 compositions retaining spatial information, we exploited our 3D model to map cell-type specific gene  
309 signatures across the heart. Interestingly we found endothelial cells and pericytes to have an  
310 approximately equivalent spatial distribution. The concurrence of these two cell-types has been  
311 extensively established (Hellström et al. 2001) (Franco et al. 2011) (Kato et al. 2018) (Murray et al.  
312 2017), hence it is captivating to find their 3D profiles correlate within the heart. This expected and  
313 well supported finding is a positive control for the additional cell-specific signatures that we have

314 revealed. Indeed, our single cell localisation hypotheses also suggested that T cells and B cells should  
315 be enriched in the midline-transverse section of the right ventricle. Studies have previously shown  
316 that the heart is comprised of cells from the hematopoietic lineage, however this novel link to a spatial  
317 compartment uncovers new possibilities for the roles of these cells in the heart (Farbehi et al. 2019),  
318 (Skelly et al. 2018), (Holzinger et al. 1996), (Pinto et al. 2016). This model holds as a suitable  
319 benchmark for hypothesis testing of cardiac cellular localisations, and possible functions of the  
320 various anatomical components.

321

322 Curiously, there were patterns indicating septal divergence from our CoA and cluster analyses, in  
323 particular the section LVC-D appeared to have dissimilar expression to its neighbouring sections.  
324 These findings align with some of the cell-type specific spatial profiles, which could account for the  
325 distinction of LVC-D, in particular Schwann cells, the subset of fibroblasts identified by (Skelly et al.  
326 2018) fibroblasts 1 and Macrophages. This difference, for instance, could be in consequence of the  
327 discontinuity of the glial cell populations, which pass down through the septal region and then diverge  
328 in the central region to the rest of the heart as Purkinje fibres (Anderson et al. 2009).

329

330 We have also uncovered upregulated genes in the superior region of the heart in comparison to the  
331 other ventricular sections. It was riveting to discover that fibroblasts 1 and macrophages had a  
332 hypothesised concentration in the apex of the heart, as well as an almost identical spatial profile. In  
333 the context of cardiac regeneration this is very enticing as both fibroblasts and macrophages are  
334 known to communicate extensively post myocardial infarcts (MI)s and jointly play a substantial role  
335 in cardiac repair, by promoting debris clearance and the establishment of the fibronectin matrix.  
336 (Sattler & Rosenthal 2016) (Chen et al. 2012) (Forte et al. 2018). It would be very intriguing to find  
337 that their communication is required for homeostatic cardiac function based on the evidence from our  
338 study, however this is something yet to be investigated.

339

340 Having drawn these conclusions, it is necessary to state that there are limitations in single cell studies  
341 of the heart, which impacts our hypotheses on cardiac cellular localisation. (Skelly et al. 2018) have  
342 only identified two subtypes of fibroblasts, however, (Farbehi et al. 2019) have identified more  
343 subtypes in the adult mouse heart. The reason for this may be because more rare cell types were  
344 captured in (Farbehi et al. 2019)'s study as only the apical section of the heart was isolated, in  
345 comparison to (Skelly et al. 2018)'s, which utilised the entire ventricle. This shows that the use of the  
346 3D-cardiomics tool, and hypotheses drawn from it could be subjective to prior analyses. Having the  
347 spatial information of cell types throughout an organ tells us not only more about the role that these  
348 cells may play in a homeostatic setting of the heart and how they maintain the organ, but we could  
349 also gain a better understanding which cells function or communicate together, and hence possibly  
350 further our understanding of these roles in other contexts such as cardiac injury and repair.

351

352 In summary, we propose that by retaining the spatial signature of the transcriptome of organs and in  
353 combination with 3D models not only allows us to visualise expression patterns across an organ but  
354 greatly enhances discovery. We anticipate that the capacity of 3D-Cardiomics to be combined with  
355 single cell or pathological signatures will be of great utility to the cardiac field.

356

357

## 358 Materials and Methods

### 359 Key resources table

360

| REAGENT or RESOURCE                           | SOURCE                              | IDENTIFIER  |
|-----------------------------------------------|-------------------------------------|-------------|
| Chemicals, Peptides, and Recombinant Proteins |                                     |             |
| Absolute Ethanol                              | Sigma-Aldrich                       | E7023       |
| Collagenase, Type I                           | Worthington Biochemical Corporation | LS004200    |
| Formalin solution, neutral buffered, 10%      | Sigma-Aldrich                       | HT501128-4L |
| Hank's Balanced Salt Solution                 | ThermoFisher Scientific             | 14175103    |
| Phosphate-buffered Saline                     | ThermoFisher Scientific             | 10010023    |
| Propidium Iodide Solution                     | Sigma-Aldrich                       | P4864       |
| Critical Commercial Assays                    |                                     |             |
| RNeasy Micro                                  | QIAGEN                              | 74004       |

|                                                  |            |                                                                                                                              |
|--------------------------------------------------|------------|------------------------------------------------------------------------------------------------------------------------------|
| Kit                                              |            |                                                                                                                              |
| RNAscope 2.5<br>LS Assay-RED                     | ACDBio     | 322150                                                                                                                       |
| TruSeq Stranded<br>Total RNA<br>Library Prep Kit | Illumina   | RS-122-2201                                                                                                                  |
|                                                  |            |                                                                                                                              |
|                                                  |            |                                                                                                                              |
| Deposited Data                                   |            |                                                                                                                              |
| Raw and<br>analyzed data                         | This paper | RNA-seq data will be made publically available from the Gene Expression Omnibus (GEO) upon the acceptance of the manuscript. |
| RNA-seq<br>summarized files                      | This paper | The summarized RNA-seq files will be made publically available upon the acceptance of the manuscript.                        |
|                                                  |            |                                                                                                                              |
| Experimental Models: Organisms/Strains           |            |                                                                                                                              |
| Mouse:<br>Wildtype<br>C57/BL6 female<br>adult    | N/A        | N/A                                                                                                                          |
| Mouse:<br>Wildtype<br>C57BL/6J                   | 000664 JAX | N/A                                                                                                                          |
|                                                  |            |                                                                                                                              |



|                                         |                                                                                       |                                                                                                                                                               |
|-----------------------------------------|---------------------------------------------------------------------------------------|---------------------------------------------------------------------------------------------------------------------------------------------------------------|
| Oligonucleotides                        |                                                                                       |                                                                                                                                                               |
| RNAscope 2.5<br>VS Probe- Mm-<br>Myl4   | ACDBio                                                                                | 443809                                                                                                                                                        |
| RNAscope 2.5<br>VS Probe- Mm-<br>Adra1a | ACDBio                                                                                | 408619                                                                                                                                                        |
| RNAscope 2.5<br>VS Probe- Mm-<br>Nppb   | ACDBio                                                                                | 425029                                                                                                                                                        |
| RNAscope 2.5<br>VS Probe- Mm-<br>Ubc    | ACDBio                                                                                | 312018                                                                                                                                                        |
| Software and Algorithms                 |                                                                                       |                                                                                                                                                               |
| Amira                                   | (ThermoFisher<br>Scientific, 2019)                                                    | <a href="https://www.fei.com/software/amira-for-life-sciences/">https://www.fei.com/software/amira-for-life-sciences/</a>                                     |
| ComplexHeatmap                          | ( <a href="#">Gu et al. 2016</a> )                                                    | <a href="https://bioconductor.org/packages/release/bioc/html/ComplexHeatmap.html">https://bioconductor.org/packages/release/bioc/html/ComplexHeatmap.html</a> |
| EdgeR                                   | ( <a href="#">Robinson et al. 2010</a> ),<br>( <a href="#">McCarthy et al. 2012</a> ) | <a href="http://bioconductor.org/packages/release/bioc/html/edgeR.html">http://bioconductor.org/packages/release/bioc/html/edgeR.html</a>                     |
| FastQC                                  | ( <a href="#">Andrews &amp;</a>                                                       | <a href="http://www.bioinformatics.babraham.ac.uk/projects/fastqc/">http://www.bioinformatics.babraham.ac.uk/projects/fastqc/</a>                             |

|             |                                       |                                                                                                                                             |
|-------------|---------------------------------------|---------------------------------------------------------------------------------------------------------------------------------------------|
|             | <u>Others 2010)</u>                   |                                                                                                                                             |
| GOplot      | <u>(Walter et al. 2015)</u>           | <a href="https://CRAN.R-project.org/package=GOplot">https://CRAN.R-project.org/package=GOplot</a>                                           |
| ggplot2     | <u>(Wickham 2016)</u>                 | <a href="https://CRAN.R-project.org/package=ggplot2">https://CRAN.R-project.org/package=ggplot2</a>                                         |
| ggrepel     | <u>(Slowikowski 2016)</u>             | <a href="https://CRAN.R-project.org/package=ggrepel">https://CRAN.R-project.org/package=ggrepel</a>                                         |
| HTSeq       | <u>(Anders et al. 2010)</u>           | <a href="https://htseq.readthedocs.io/en/release_0.10.0/">https://htseq.readthedocs.io/en/release_0.10.0/</a>                               |
| Made4       | <u>(Culhane et al. 2005)</u>          | <a href="http://bioconductor.org/packages/release/bioc/html/made4.html">http://bioconductor.org/packages/release/bioc/html/made4.html</a>   |
| Maya        | (Autodesk, 2019)                      | <a href="https://www.autodesk.com.au/products/maya/overview">https://www.autodesk.com.au/products/maya/overview</a>                         |
| Metascape   | <u>(Tripathi et al. 2015)</u>         | <a href="http://metascape.org/">http://metascape.org/</a>                                                                                   |
| Mfuzz       | <u>(Futschik &amp; Carlisle 2005)</u> | <a href="https://bioconductor.org/packages/release/bioc/html/Mfuzz.html">https://bioconductor.org/packages/release/bioc/html/Mfuzz.html</a> |
| Panther     |                                       |                                                                                                                                             |
| Samtools    | <u>(Li et al. 2009)</u>               | <a href="http://samtools.sourceforge.net/">http://samtools.sourceforge.net/</a>                                                             |
| STAR        | <u>(Dobin et al. 2013)</u>            | <a href="https://github.com/alexdobin/STAR">https://github.com/alexdobin/STAR</a>                                                           |
| treemap     | <u>(Tennekes 2013)</u>                | <a href="https://CRAN.R-project.org/package=treemap">https://CRAN.R-project.org/package=treemap</a>                                         |
| Trimmomatic | <u>(Bolger et al. 2014)</u>           | <a href="http://www.usadellab.org/cms/?page=trimmomatic">http://www.usadellab.org/cms/?page=trimmomatic</a>                                 |
| Unity       | Unity                                 | <u>2018.3.10f1</u>                                                                                                                          |

|                                          |                                                                                                     |           |
|------------------------------------------|-----------------------------------------------------------------------------------------------------|-----------|
|                                          | Technologies<br><a href="https://unity.com">(<a href="https://unity.com">https://unity.com</a>)</a> |           |
|                                          |                                                                                                     |           |
| Other                                    |                                                                                                     |           |
| Automatic cell counter EVE               | NanoEnTek                                                                                           | EVE-MC    |
| Bio-Gen PRO200 Homogenizer               | PRO Scientific                                                                                      | 01-01200  |
| BOND RX Fully Automated Research Stainer | Leica Biosystems                                                                                    | 21.2821   |
| Mouse Heart Slicer Matrix                | ZINC Instruments                                                                                    | HSMS005-1 |

361

362

363 Contact for reagent and resource sharing

364 Further information and requests for resources and reagents should be directed to and will be fulfilled

365 by Lead Contact Jose Polo ([jose.polo@monash.edu](mailto:jose.polo@monash.edu)).

366

367

## 368 Experimental model and subject details

### 369 Mice

370 For the sequencing experiment, C57/BL6 mice were housed at the Monash University animal facility  
371 in strict accordance with good animal practices defined by the National Health and Medical Research  
372 Council (Australia) Code of Practice for the Care and Use of Animals for Experimental Purposes. All  
373 experimental procedures were performed under the approval of the Monash University Animal  
374 Research Platform animal ethics committee. For the *in vivo* validations, C57BL/6J from JAX, were  
375 used with good animal practices defined by the Public Health Service Policy on the Humane Care and  
376 Use of Laboratory Animals and the Guide for the Care and Use of Laboratory animals; in compliance  
377 with all federal, state and local guidelines, regulations and animal care programs, fully accredited by  
378 the Association for the Assessment and Accreditation of Laboratory Animal Care International.

379

## 380 Method details

### 381 Heart extraction and microdissection

382 Mice of approximately 6-10 weeks of age were culled using the cervical dislocation method, then  
383 sprayed with 80% v/v ethanol and immediately dissected through the abdomen under the sternum.  
384 Once the diaphragm was dissected away to access the upper abdominal cavity, the rib cage was cut  
385 and lifted to expose the heart and lungs. Perfusion was then performed on the heart. Firstly small  
386 incisions were made on each lobe of the liver to aid in bloodletting. Hanks' Balanced Salt Solution  
387 was delivered through the left ventricle for one minute, using a 10 mL syringe with a 26-gauge  
388 needle. Hearts were removed by grasping the heart by the root and cutting through the major vessels  
389 and surrounding connective tissue. Once removed, the heart was placed in 310 mO Phosphate  
390 Buffered Solution (PBS) to clean up excess fat, connective tissue, lungs thymus and trachea.

391

392 The isolated hearts were first dissected using Vannas scissors to remove the atria and major vessels.  
393 Each ventricle was then microdissected into four equidistant transverse sections with a mouse heart  
394 slicer matrix. An anchor blade was used at the superior end of the heart to ensure the heart did not  
395 move. The blades were firmly pressed down simultaneously to cut through the ventricles. All sections  
396 were then placed into PBS and individually dissected into the sections as specified in Figure 1C with  
397 Vannas scissors.

398

#### 399 Tissue preparation

400 The microdissected sections of each heart were placed in 250  $\mu$ l Buffer RLT as supplied by QIAGEN  
401 RNeasy Micro Kit. Six samples were processed at a time whilst the remaining sections were stored at  
402  $-80^{\circ}\text{C}$ . The samples were homogenised for 30 seconds at medium speed (setting 2). The homogeniser  
403 was cleaned with 80% v/v ethanol for 15 seconds, and then with deionised water for 15 seconds. The  
404 samples were then immediately processed for RNA extraction.

405

#### 406 RNAScope in situ hybridization

407 Hearts were fixed in 10% neutral buffered formalin (Sigma-Aldrich), processed for paraffin  
408 embedding and 5 $\mu$ M longitudinal sections used for automated staining with RNAScope 2.5 LS  
409 Reagent Kit—Red (ACDBio) on a Leica Biosystems' BOND RX Research Advanced Staining  
410 System (Leica). Probes used were as follows: Myl4 443809; Adra1a 408619; Nppb 425029 and  
411 positive control Ubc 312018.

412

#### 413 RNA sequencing

414 RNA extraction and purification of all samples was done using the RNeasy Micro Kit according to  
415 manufacturer's instructions. An illumina TruSeq Stranded Total RNA kit was used to prepare the

416 libraries for poly-A enrichment of mRNA. For sample amplification, 15 PCR cycles were used,  
417 standard to the Illumina kit protocol. RNA sequencing was performed on an Illumina NextSeq500.  
418 Each library was paired-end with 75bp reads, as well as 20 million reads per sample.

419

### 420 3D Heart Model

421 Amira was used to export the 3D graphical model of the adult mouse heart [reference Ruijter] into  
422 Wavefront .obj files, which could then subsequently be used with 3D modeling software Maya (2015)  
423 to perform the computational slicing and sectioning. For this, the heart was first sliced into 5  
424 transverse pieces as with the biological samples. Slicing of the 3D model was done using the “Slice”  
425 tool in Maya, which allows a straight line to be drawn to cut the object completely through. Each slice  
426 was then ‘sealed’ to give the appearance of solid tissue. The ‘sealing’ of the slices was done by  
427 adding faces individually to the model until the slice was completely covered. Once sealed, each slice  
428 was then sectioned into 18 pieces, again using the Slice tool. Similar to the slicing process, each piece  
429 was subsequently sealed by adding faces.

430

### 431 User interface

432 A visual system was developed to integrate RNA-seq datasets onto computational model pieces of the  
433 heart using the C# programming language in the Unity environment. The program was compiled to  
434 the WebGL platform to allow cross-platform accessibility through a web browser and fast data  
435 retrieval. Source code is freely available on GitHub (<https://github.com/Ramialison-Lab-ARMI/3DCardiomics>). For visualization purposes, the normalized values of gene expression observed  
436 on the web interface were calculated by normalization to the local minimum and maximum  
437 expression of the gene.

438

### 440 Gene expression analysis

441 Raw sequencing reads were filter/trimmed using trimmomatic ([Bolger et al. 2014](#)). Sequencing reads  
442 were aligned to GENCODE's mouse reference genome (GRCm38 primary assembly, vM9  
443 annotation) with STAR (v2.4.2a), ([Dobin et al. 2013](#)). Gene read counts were generated with HTSeq  
444 ([Anders et al. 2010](#)). Genes with 1 count per million (CPM) in at least two of the samples were kept  
445 for further analysis. For differential expression analyses, normalisation factors were calculated by the  
446 trimmed means method using the EdgeR function calcNormfactors ([Robinson et al. 2010](#)). The glmFit  
447 and glmLRT functions from the EdgeR package were used to perform differential gene expression  
448 analysis. The design matrix required for these analyses included specification of heart segment and  
449 batch label, in order to remove the batch effect. For the remainder of the analysis CPM values were  
450 used throughout the study, and RPKM values were used for the cluster analysis. To remove the batch  
451 effect for further analyses removeBatchEffect from EdgeR was used. The plotMDS function from  
452 EdgeR was used for MDS analysis and visualisation. Made4 was utilised for CA ([Culhane et al.](#)  
453 [2005](#)). Mfuzz was used for the soft cluster analysis. The number of clusters specified were determined  
454 by the total number of dimensions explaining at least 95% of the variance in the data from the COA  
455 on the dataset with RPKM values. Metascape was used for biological processes enrichment. The  
456 treemap package was used for the treemap visualizations. All visualizations were made with ggplot2  
457 unless otherwise specified. Unsupervised hierarchical clustering and the ComplexHeatmap map  
458 package were used on significantly differentially expressed genes.

459

460

## 461 Acknowledgements

462 We would like to acknowledge the Histology and Microscopy Cores of the Jackson Laboratory for  
463 performing the RNAScope experiments, the Ramaciotti Centre for Genomics for performing the NGS  
464 experiments. We would also like to thank the Monash Animal Research Platform and Monash  
465 Flowcore for providing required services throughout the course of the project. J.M.P. was funded by a  
466 Sylvia-Charles Viertel Fellowship and an ARC Future Fellowship M.R. was funded by a

467 NHMRC/Heart Foundation Career Development Fellowship and ARC Discovery Project Grant. A.T.  
468 was supported by a Biomedical Research Victoria UROP/CSL scholarship. The Australian  
469 Regenerative Medicine Institute is supported by grants from the State Government of Victoria and the  
470 Australian Government. Finally we would like to thank Dr. Jan Ruijter, Dr. Alexander Pinto, Ms.  
471 Jeannette Hallab, Mr. Markus Tondl, Dr. Michael Eichenlaub, Dr. Anja Knaupp, Dr. Ethan Liu, Dr.  
472 Jaber Firas, Dr. Sue Mei Lim, Dr. Sara Alaei, Dr. Gonzalo Del Monte-Nieto, the Ramialison  
473 laboratory and the Polo laboratory for their valuable contributions to this study.

474

## 475 Author Contributions

476 J.M.P. conceived the study. J.M.P. and M.R. designed the experiments and co-lead the project and  
477 supervised the project together with F.J.R.. M.M. and F.J.R. performed the bioinformatics analysis,  
478 with contributions from N.M.T., A.T. and H.N.. M.M. interpreted the data with contributions from  
479 N.T, A.T.. M.M. generated the figures with contributions from N.M.T., A.T., M.B.F., M.W.C. and  
480 F.J.R.. N.T. performed the heart isolation with input from J.H., S.K.N., M.F. and M.W.C. and  
481 generated the transcriptional data and adapted the K.V.D. 3D model of the heart. A.T. developed and  
482 optimised the 3D-cardiomics user interface with contributions from N.M.T., A.P., D.P. and F.J.R..  
483 M.F., M.W.C. generated the RNAscope datasets. M.M., F.J.R., M.R. and J.M.P. wrote the manuscript  
484 with contributions from N.M.T., A.T.. All authors approved of and contributed to the final version of  
485 the manuscript.

486

## 487 Competing Interests

488 The authors declare no competing interests.

489

490



## 491 References

- 492 Aanhaanen, W.T.J. et al., 2010. Developmental origin, growth, and three-dimensional architecture of  
493 the atrioventricular conduction axis of the mouse heart. *Circulation research*, 107(6), pp.728–736.
- 494 Andersen, P.S. et al., 2012. A novel Myosin essential light chain mutation causes hypertrophic  
495 cardiomyopathy with late onset and low expressivity. *Biochemistry research international*, 2012,  
496 p.685108.
- 497 Anderson, R.H. et al., 2009. The anatomy of the cardiac conduction system. *Clinical anatomy* , 22(1),  
498 pp.99–113.
- 499 Anders, S., Pyl, P.T. & Huber, W., 2010. HTSeq: Analysing high-throughput sequencing data with  
500 Python.
- 501 Andrews, S. & Others, 2010. FastQC: a quality control tool for high throughput sequence data.
- 502 Asp, M. et al., 2017. Spatial detection of fetal marker genes expressed at low level in adult human  
503 heart tissue. *Scientific reports*, 7(1), p.12941.
- 504 de Boer, B.A. et al., 2011. The interactive presentation of 3D information obtained from reconstructed  
505 datasets and 3D placement of single histological sections with the 3D portable document ....  
506 Available at: [http://dev.biologists.org/content/138/1/159.short\\_](http://dev.biologists.org/content/138/1/159.short_)
- 507 Bolger, A.M., Lohse, M. & Usadel, B., 2014. Trimmomatic: a flexible trimmer for Illumina sequence  
508 data. *Bioinformatics* , 30(15), pp.2114–2120.
- 509 Burkhard, S.B. & Bakkers, J., 2018. Spatially resolved RNA-sequencing of the embryonic heart  
510 identifies a role for Wnt/ $\beta$ -catenin signaling in autonomic control of heart rate. *eLife*, 7. Available at:  
511 [http://dx.doi.org/10.7554/eLife.31515\\_](http://dx.doi.org/10.7554/eLife.31515_)
- 512 Campione, M. et al., 2001. Pitx2 expression defines a left cardiac lineage of cells: evidence for atrial  
513 and ventricular molecular isomerism in the iv/iv mice. *Developmental biology*, 231(1), pp.252–264.

- 514 Chen, J. et al., 2017. Spatial transcriptomic analysis of cryosectioned tissue samples with Geo-seq.  
515 *Nature protocols*, 12(3), pp.566–580.
- 516 Chen, W. et al., 2012. Endogenous IRAK-M attenuates postinfarction remodeling through effects on  
517 macrophages and fibroblasts. *Arteriosclerosis, thrombosis, and vascular biology*, 32(11), pp.2598–  
518 2608.
- 519 Culhane, A.C. et al., 2005. MADE4: an R package for multivariate analysis of gene expression data.  
520 *Bioinformatics* , 21(11), pp.2789–2790.
- 521 Dobin, A. et al., 2013. STAR: ultrafast universal RNA-seq aligner. *Bioinformatics* , 29(1), pp.15–21.
- 522 Farbehi, N. et al., 2019. Single-cell expression profiling reveals dynamic flux of cardiac stromal,  
523 vascular and immune cells in health and injury. *eLife*, 8. Available at:  
524 <http://dx.doi.org/10.7554/eLife.43882>.
- 525 Forte, E., Furtado, M.B. & Rosenthal, N., 2018. The interstitium in cardiac repair: role of the  
526 immune–stromal cell interplay. *Nature reviews. Cardiology*, 15(10), pp.601–616.
- 527 Franco, M. et al., 2011. Pericytes promote endothelial cell survival through induction of autocrine  
528 VEGF-A signaling and Bcl-w expression. *Blood*, 118(10), pp.2906–2917.
- 529 Futschik, M.E. & Carlisle, B., 2005. Noise-robust soft clustering of gene expression time-course data.  
530 *Journal of bioinformatics and computational biology*, 3(4), pp.965–988.
- 531 Garne, E. et al., 2007. Survival and Health in Liveborn Infants with Transposition of Great Arteries—  
532 A Population-based Study. *Congenital heart disease*. Available at:  
533 <https://onlinelibrary.wiley.com/doi/abs/10.1111/j.1747-0803.2007.00093.x>.
- 534 Gudbjartsson, D.F. et al., 2017. A frameshift deletion in the sarcomere gene MYL4 causes early-onset  
535 familial atrial fibrillation. *European heart journal*, 38(1), pp.27–34.

- 536 Gu, J.-Y. et al., 2012. Novel GATA5 loss-of-function mutations underlie familial atrial fibrillation.  
537 *Clinics* , 67(12), pp.1393–1399.
- 538 Gu, Z., Eils, R. & Schlesner, M., 2016. Complex heatmaps reveal patterns and correlations in  
539 multidimensional genomic data. *Bioinformatics* , 32(18), pp.2847–2849.
- 540 Hellström, M. et al., 2001. Lack of pericytes leads to endothelial hyperplasia and abnormal vascular  
541 morphogenesis. *The Journal of cell biology*, 153(3), pp.543–553.
- 542 Holzinger, C. et al., 1996. Are T cells from healthy heart really only passengers? Characterization of  
543 cardiac tissue T cells. *Immunology letters*, 53(2-3), pp.63–67.
- 544 Hoogaars, W.M.H. et al., 2007. Tbx3 controls the sinoatrial node gene program and imposes  
545 pacemaker function on the atria. *Genes & development*, 21(9), pp.1098–1112.
- 546 Huang, C. et al., 2003. Embryonic atrial function is essential for mouse embryogenesis, cardiac  
547 morphogenesis and angiogenesis. *Development* , 130(24), pp.6111–6119.
- 548 Junker, J.P. et al., 2014. Genome-wide RNA Tomography in the zebrafish embryo. *Cell*, 159(3),  
549 pp.662–675.
- 550 Karaiskos, N. et al., 2017. The Drosophila embryo at single-cell transcriptome resolution. *Science*,  
551 358(6360), pp.194–199.
- 552 Kato, K. et al., 2018. Pulmonary pericytes regulate lung morphogenesis. *Nature communications*,  
553 9(1), p.2448.
- 554 Komura, N. et al., 2013. Adiponectin protein exists in aortic endothelial cells. *PLoS one*, 8(8),  
555 p.e71271.
- 556 Li, H. et al., 2009. The Sequence Alignment/Map format and SAMtools. *Bioinformatics* , 25(16),  
557 pp.2078–2079.

- 558 Massaia, A. et al., 2018. Single Cell Gene Expression to Understand the Dynamic Architecture of the  
559 Heart. *Frontiers in cardiovascular medicine*, 5, p.167.
- 560 McCarthy, D.J., Chen, Y. & Smyth, G.K., 2012. Differential expression analysis of multifactor RNA-  
561 Seq experiments with respect to biological variation. *Nucleic acids research*, 40(10), pp.4288–4297.
- 562 Moorman, A.F.M. & Christoffels, V.M., 2003. Cardiac chamber formation: development, genes, and  
563 evolution. *Physiological reviews*, 83(4), pp.1223–1267.
- 564 Motoki, H. et al., 2009. Coagulation Activity is Increased in the Left Atria of Patients With  
565 Paroxysmal Atrial Fibrillation During the Non-Paroxysmal Period. *Circulation journal: official  
566 journal of the Japanese Circulation Society*, advpub, pp.0906100390–0906100390.
- 567 Murray, I.R. et al., 2017. Skeletal and cardiac muscle pericytes: Functions and therapeutic potential.  
568 *Pharmacology & therapeutics*, 171, pp.65–74.
- 569 Orr, N. et al., 2016. A mutation in the atrial-specific myosin light chain gene (MYL4) causes familial  
570 atrial fibrillation. *Nature Communications*, 7(1). Available at:  
571 <http://dx.doi.org/10.1038/ncomms11303>.
- 572 Patel, S. et al., 2008. Variation in the ADIPOQ gene promoter is associated with carotid intima media  
573 thickness independent of plasma adiponectin levels in healthy subjects. *European heart journal*,  
574 29(3), pp.386–393.
- 575 Peng, W. et al., 2017. Dysfunction of Myosin Light-Chain 4 (MYL4) Leads to Heritable Atrial  
576 Cardiomyopathy With Electrical, Contractile, and Structural Components: Evidence From  
577 Genetically-Engineered Rats. *Journal of the American Heart Association*, 6(11). Available at:  
578 <http://dx.doi.org/10.1161/jaha.117.007030>.
- 579 Pinto, A.R. et al., 2016. Revisiting Cardiac Cellular Composition. *Circulation research*, 118(3),  
580 pp.400–409.

- 581 Robinson, M.D., McCarthy, D.J. & Smyth, G.K., 2010. edgeR: a Bioconductor package for  
582 differential expression analysis of digital gene expression data. *Bioinformatics* , 26(1), pp.139–140.
- 583 Rodriques, S.G. et al., 2019. Slide-seq: A scalable technology for measuring genome-wide expression  
584 at high spatial resolution. *Science*, 363(6434), pp.1463–1467.
- 585 Sattler, S. & Rosenthal, N., 2016. The neonate versus adult mammalian immune system in cardiac  
586 repair and regeneration. *Biochimica et biophysica acta*, 1863(7 Pt B), pp.1813–1821.
- 587 Shih, D.M. et al., 1998. Mice lacking serum paraoxonase are susceptible to organophosphate toxicity  
588 and atherosclerosis. *Nature*, 394(6690), pp.284–287.
- 589 Siffel, C. et al., 2015. Survival of Children With Hypoplastic Left Heart Syndrome. *Pediatrics*,  
590 136(4), pp.e864–70.
- 591 Skelly, D.A. et al., 2018. Single-Cell Transcriptional Profiling Reveals Cellular Diversity and  
592 Intercommunication in the Mouse Heart. *Cell reports*, 22(3), pp.600–610.
- 593 Slowikowski, K., 2016. ggrepel: Repulsive text and label geoms for “ggplot2.” *R package version 0.*  
594 *6*, 5(11).
- 595 Sordahl, L., 1976. Differences in mitochondrial functions from right and left ventricular myocardium  
596 of four mammalian species. *Comparative biochemistry and physiology. B, Comparative biochemistry*,  
597 54(3), pp.339–342.
- 598 Ståhl, P.L. et al., 2016. Visualization and analysis of gene expression in tissue sections by spatial  
599 transcriptomics. *Science*, 353(6294), pp.78–82.
- 600 Tennekes, M., 2013. treemap: Treemap visualization.
- 601 Tripathi, S. et al., 2015. Meta- and Orthogonal Integration of Influenza “OMICS” Data Defines a Role  
602 for UBR4 in Virus Budding. *Cell host & microbe*, 18(6), pp.723–735.

- 603 Tward, A. et al., 2002. Decreased atherosclerotic lesion formation in human serum paraoxonase  
604 transgenic mice. *Circulation*, 106(4), pp.484–490.
- 605 Voelkel, N.F. et al., 2006. Right ventricular function and failure: report of a National Heart, Lung, and  
606 Blood Institute working group on cellular and molecular mechanisms of right heart failure.  
607 *Circulation*, 114(17), pp.1883–1891.
- 608 Waardenberg, A.J. et al., 2014. Genetic networks governing heart development. *Cold Spring Harbor*  
609 *perspectives in medicine*, 4(11), p.a013839.
- 610 Walter, W., Sánchez-Cabo, F. & Ricote, M., 2015. GOpilot: an R package for visually combining  
611 expression data with functional analysis. *Bioinformatics* , 31(17), pp.2912–2914.
- 612 Wang, T.Y. et al., 2018. Cardiomyocytes have mosaic patterns of protein expression. *Cardiovascular*  
613 *pathology: the official journal of the Society for Cardiovascular Pathology*, 34, pp.50–57.
- 614 Wang, X. et al., 2018. Three-dimensional intact-tissue sequencing of single-cell transcriptional states.  
615 *Science*, 361(6400). Available at: <http://dx.doi.org/10.1126/science.aat5691>.
- 616 Wickham, H., 2016. *ggplot2: Elegant Graphics for Data Analysis*, Springer.
- 617 Yue, X. et al., 2017. Heterogeneity of transverse-axial tubule system in mouse atria: Remodeling in  
618 atrial-specific Na<sup>+</sup>-Ca<sup>2+</sup> exchanger knockout mice. *Journal of molecular and cellular cardiology*,  
619 108, pp.50–60.
- 620 Zhi, Y. et al., 2016. Transcriptional analysis of atrial and ventricular muscles from rats. *Genetics and*  
621 *molecular research: GMR*, 15(1). Available at: <http://dx.doi.org/10.4238/gmr.15017330>.
- 622
- 623

## 624 Supplemental Information

### 625 Supplementary table legends

#### 626 Supplementary table1: CA and DGE analyses outputs

627 The top 500 genes explaining most of the variability in the data of the CA, which included all cardiac  
628 sections (sheet 1), with enriched biological processes (sheet 2); the top 500 genes of the CA analysis,  
629 which included ventricular sections, in dimensions 1 and 2 (sheet 3) and respective biological  
630 processes enriched (sheet 4); the top 500 genes of the CA analysis, which included ventricular  
631 sections, in dimensions 5 and 6 (sheet 5) and respective biological processes enriched (sheet 6).  
632 Finally, the DGE analysis outputs of the left atria compared to the right (sheet 7) and the right  
633 ventricle compared to the left (sheet 8).

#### 634 Supplementary table 2: Soft cluster analysis outputs

635 Outputs of the soft cluster analysis. Firstly, a list of all of the genes belonging to a cluster with a  
636 probability of at least 0.7 (sheet 1). The remaining sheets include biological processes enriched for  
637 each of the clusters.

638

639

640

641

642

643

644

645

646

647

648

649

650

651

652

653

654

655

656

657

658

659

660



661 Figures

662 Figure 1

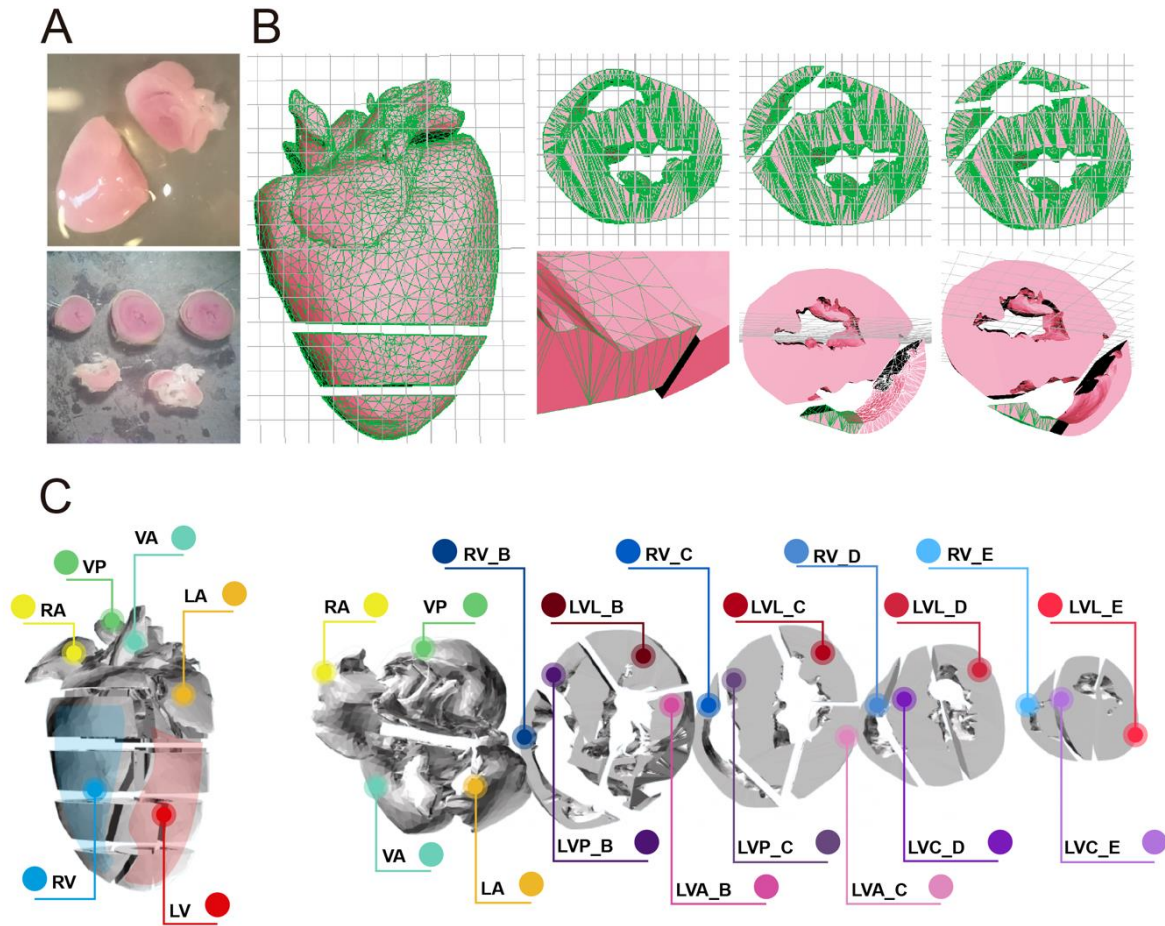

663

664 *Figure 1: Schematic for designing the 3D-cardiomics interface, and*  
665 *nomenclature*

666 A) Microdissection of the mouse heart. The atria and vessels were first sectioned from the ventricle  
667 (top), followed by sectioning of the ventricular pieces (bottom). B) *in silico* sectioning of the 3D  
668 murine cardiac model in Maya. C) Nomenclature for combinations of the specific sections and for  
669 each section of the heart model. Nomenclature: VP = vessel posterior, VA = vessel anterior, RA =  
670 right atrium, LA = left atrium, RV = right ventricle, LV = left ventricle, LVP = left ventricle posterior,  
671 LVA = left ventricle anterior, LVC = left ventricle centre, LVL = left ventricle left. The ventricle was  
672 sectioned into 4 larger sections which were B, C, D, E in order from the superior part of the ventricle  
673 to the inferior.

674

675 Figure 2

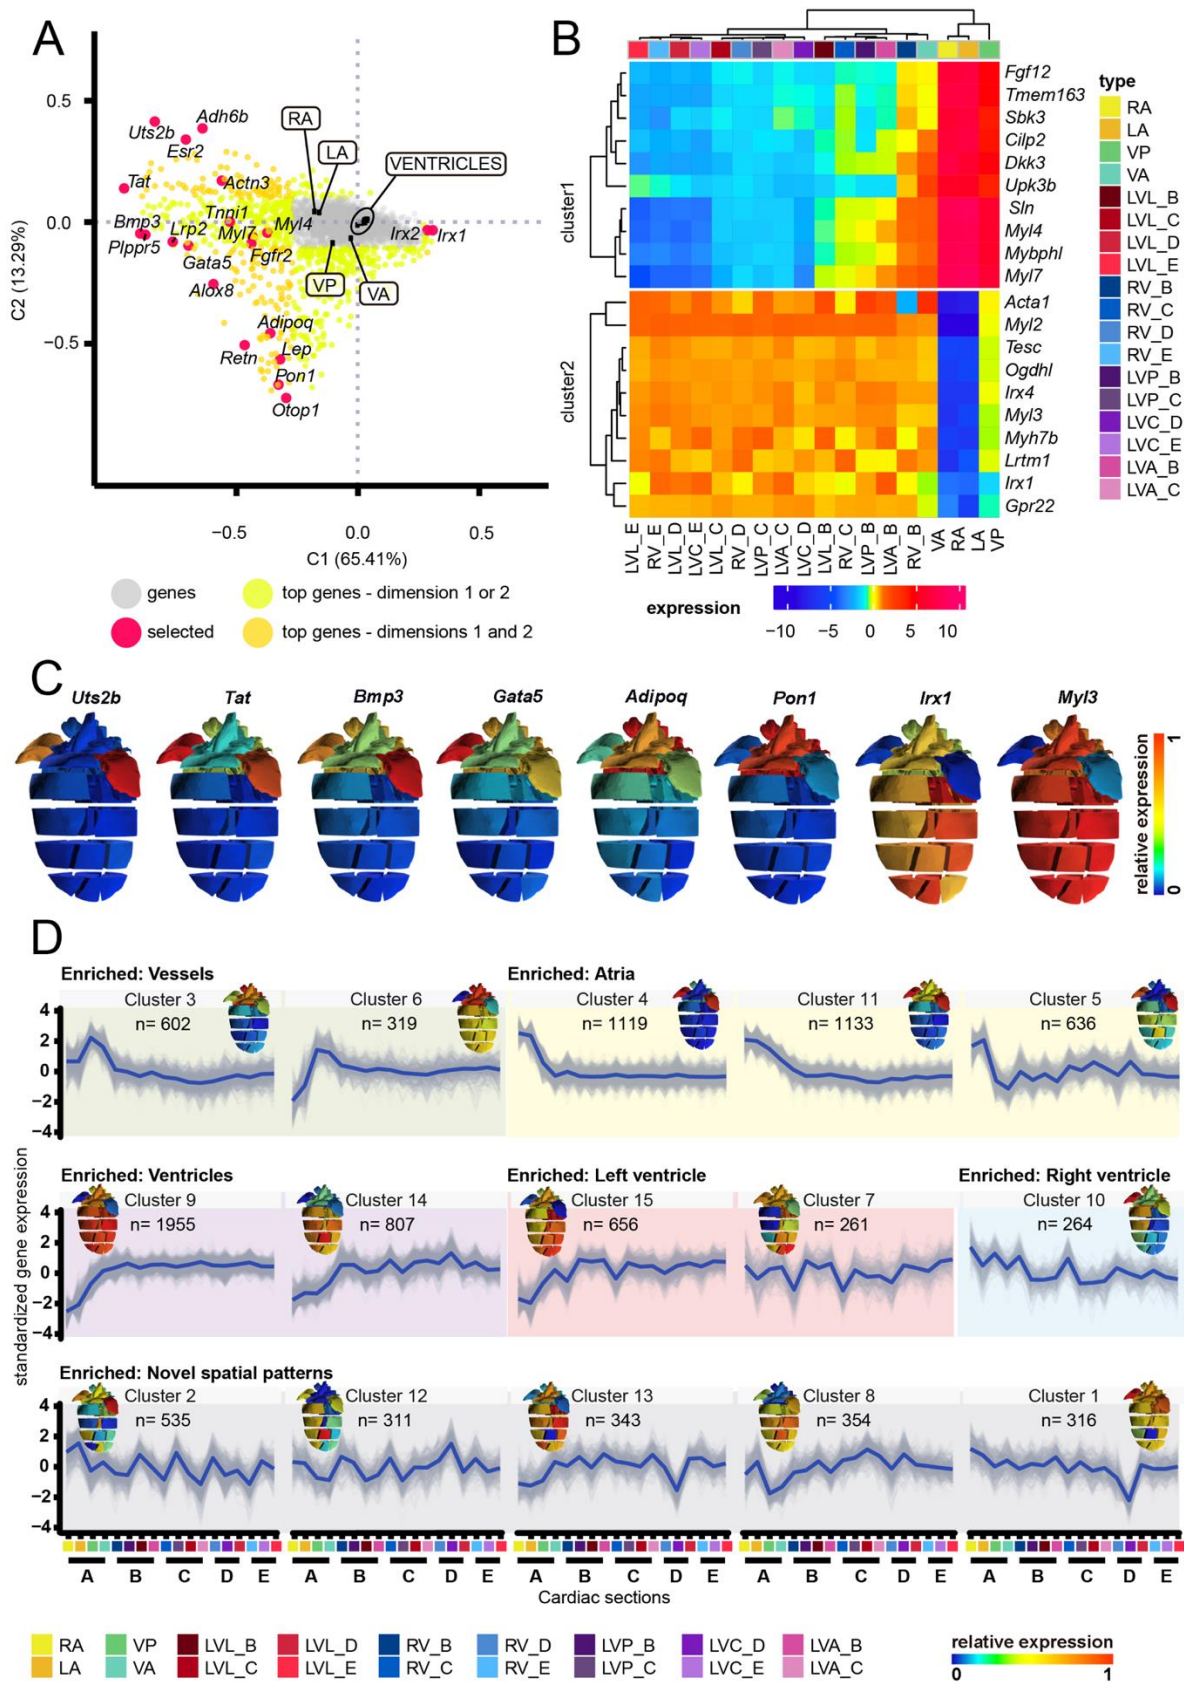

677 *Figure 2: Characterization of gene expression across the mouse heart*

678 A) Biplot, visualizing the separation of all genes and all sections in the first two components of CoA.  
679 Genes highlighted are the top 500 genes contributing to the most variance in components one and the  
680 top 500 genes in component two. B) Heatmap depicting hierarchical clustering of all cardiac sections  
681 and significant differentially expressed genes (atria and vessels against ventricles) with the highest  
682 absolute logFC values. C) Gene expression profiles of selected genes from the biplot visualized with  
683 the 3D-cardiomics user interface tool. D) Soft clusters of cardiac gene expression in mouse,  
684 represented in 2D and 3D.  
685

686 Figure 3

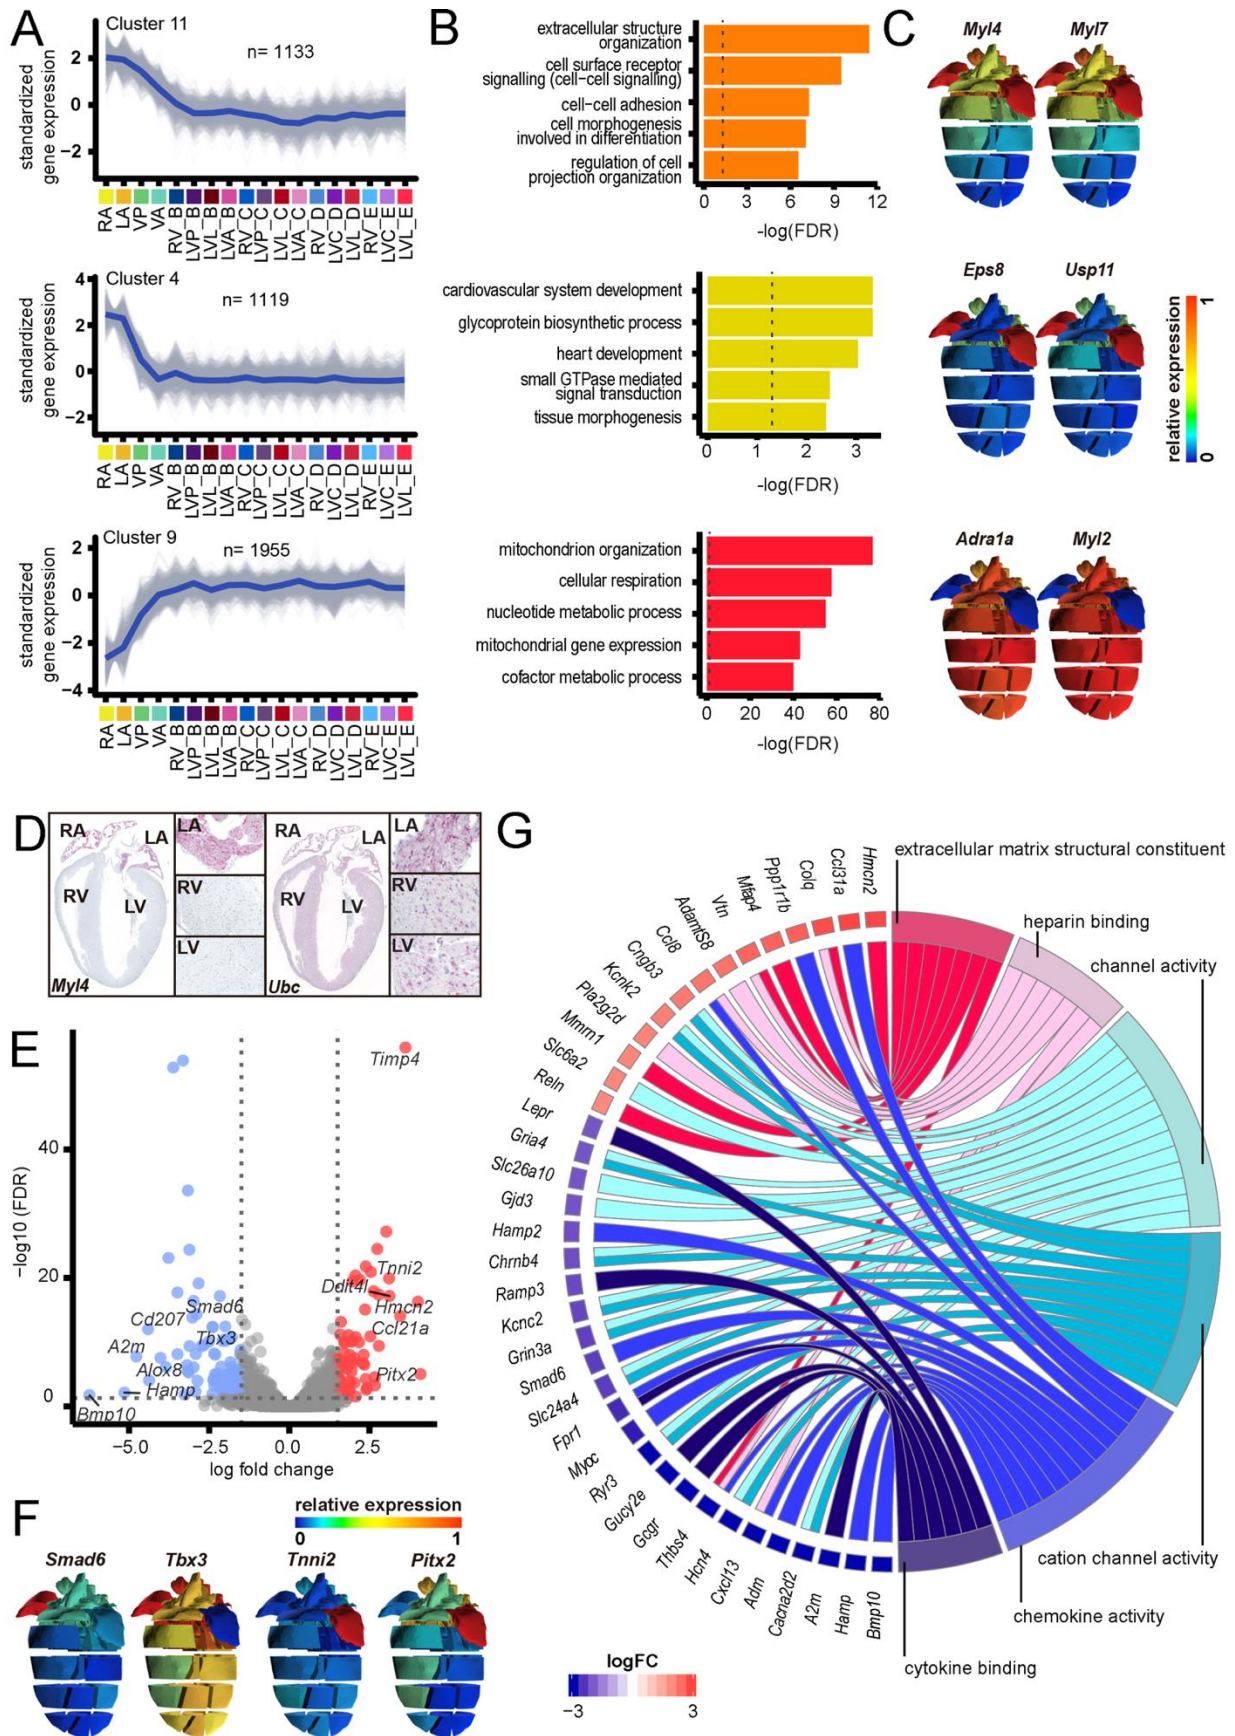

687

688 *Figure 3: Transcriptome profiles of the atria*

689 A) Soft clusters that contain genes describing the major differences between the atria and ventricles.  
690 B) The respective biological processes and C) selected gene expression profiles for soft clusters 11, 4  
691 and 9. D) RNA-scope in situ hybridization of atrial specific gene *Myl4* which had been identified in  
692 clusters 4 and the highly expressed gene *Ubc*. Whole heart section is at 2.5X magnification and partial  
693 sections were at 10X magnification. E) Volcano plot of differentially expressed genes from DGE  
694 analysis of the left atria against the right. F) Gene expression profiles for several selected  
695 differentially expressed genes between the left and right atria. G) Circos diagram depicting  
696 differentially expressed genes with their log fold change, linked to one or more of the most enriched  
697 molecular functions of the DGE analysis.

698

699

700

701

702

703

704

705

706

707

708

709

710 Figure 4

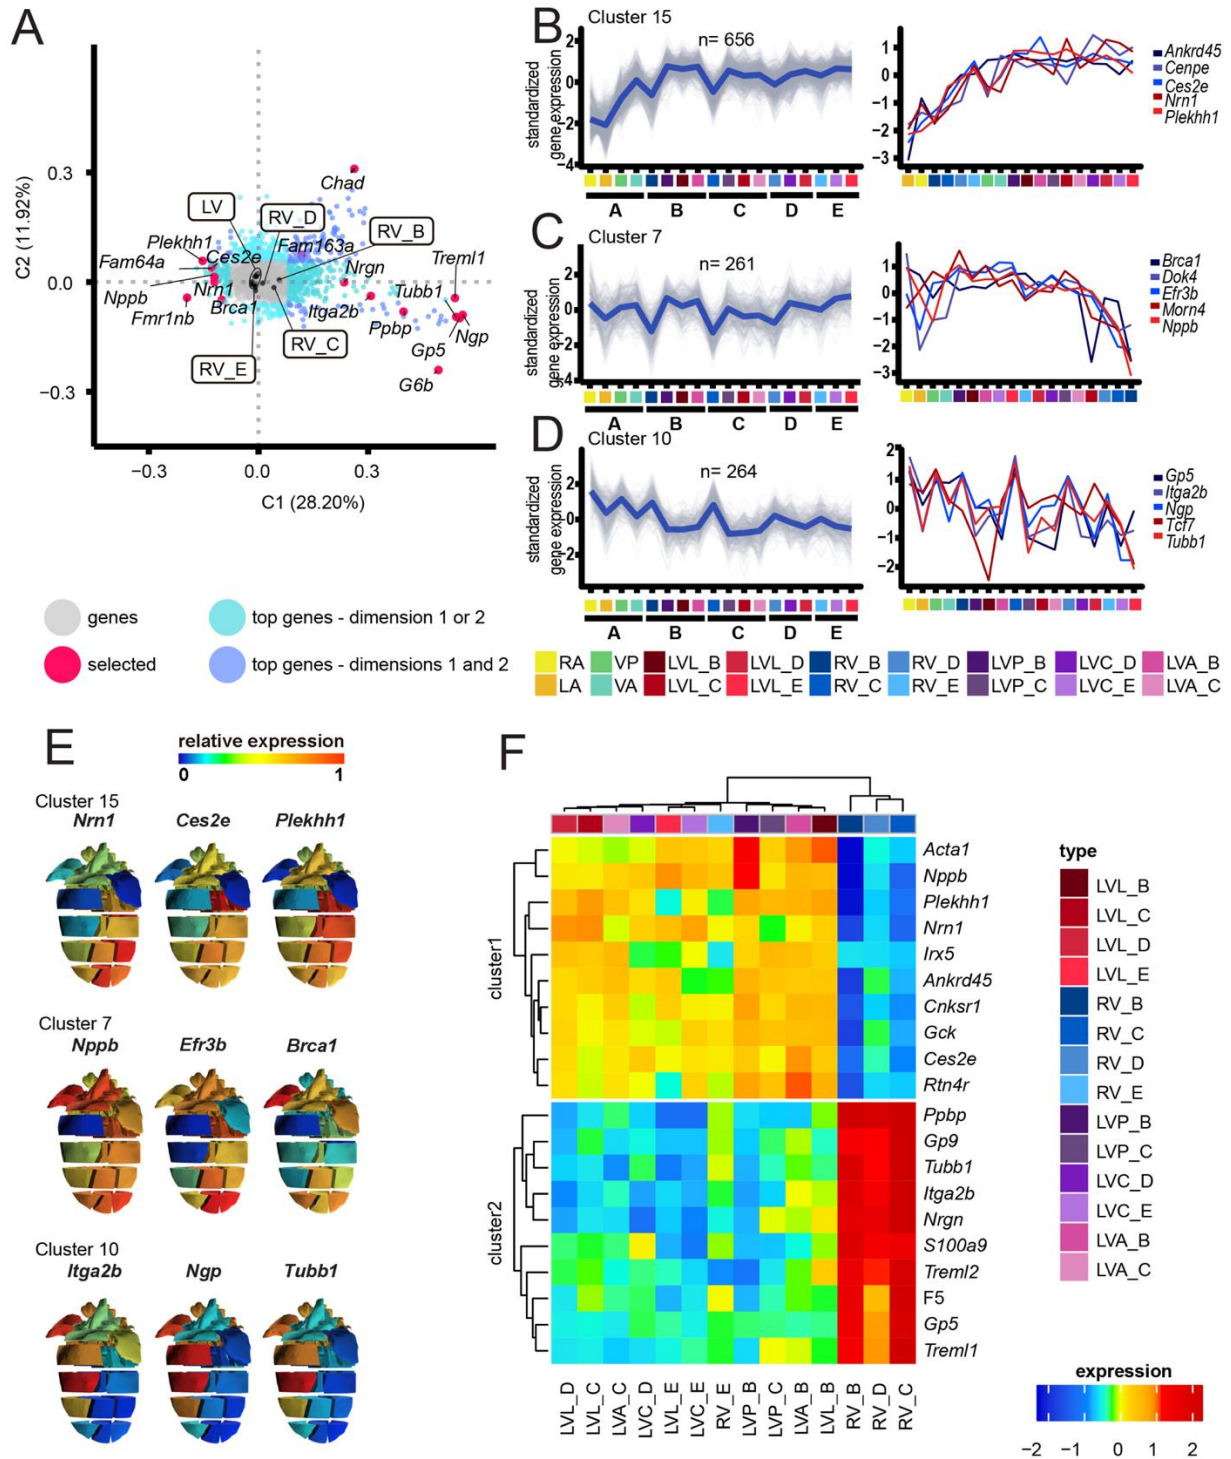

711

712 *Figure 4: Transcriptional differences between the left and right ventricles*

713 A) Biplot, visualizing the separation of all genes and all ventricular sections in the first two  
714 components of CoA. Genes highlighted are the top 500 genes contributing to the most variance in  
715 components one and the top 500 genes in component two. B-D) Soft clusters consisting genes highly  
716 expressed in the left ventricle (B,C) or the right ventricle (D), as well as gene expression profiles for  
717 selected genes from their respective cluster (sections of the selected genes plots were rearranged in  
718 the x-axis to clearly show the major differences between the ventricles). E) Selected gene expression  
719 profiles in 3D from respective clusters in B-D). F) Heatmap depicting hierarchical clustering of all  
720 cardiac sections and significant differentially expressed genes (right against left ventricle) with the  
721 highest absolute logFC values.

722



723 Figure 5

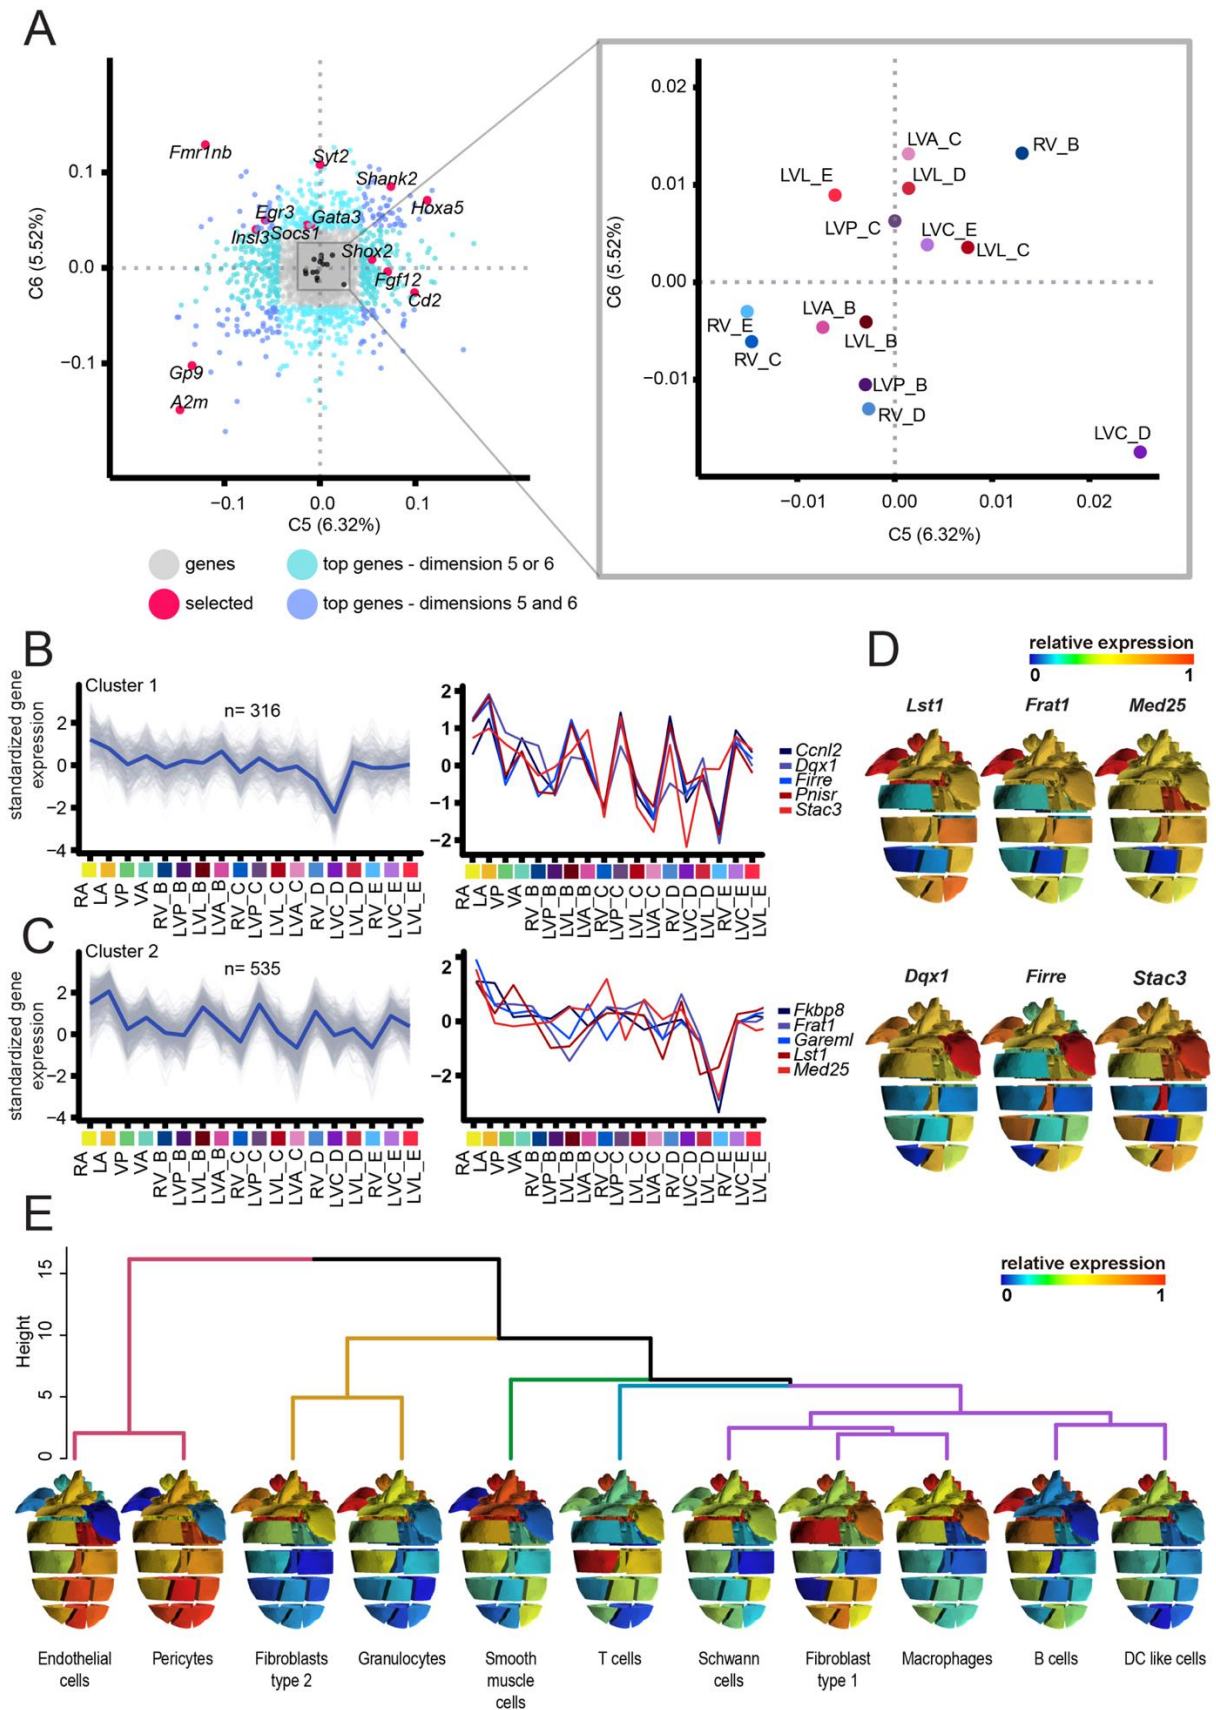

724

725 *Figure 5: Further characterization of gene expression networks of the*  
726 *ventricles*

727 A) The biplot which shows the spread of the ventricular sections, and genes in components 5 and 6.  
728 The biplot is enlarged at the coordinates of the ventricular sections to depict their spread. B-C)  
729 Clusters identified which depict an atypical gene expression profile of the cardiac sections, and  
730 individual gene expression profiles of selected genes within the identified clusters, which are also top  
731 genes in A). D) Selected gene expression profiles in 3D respective to clusters B and C. E)  
732 Hierarchical clustering of gene expression profiles of cell types across the heart.

733

734 Figure 6

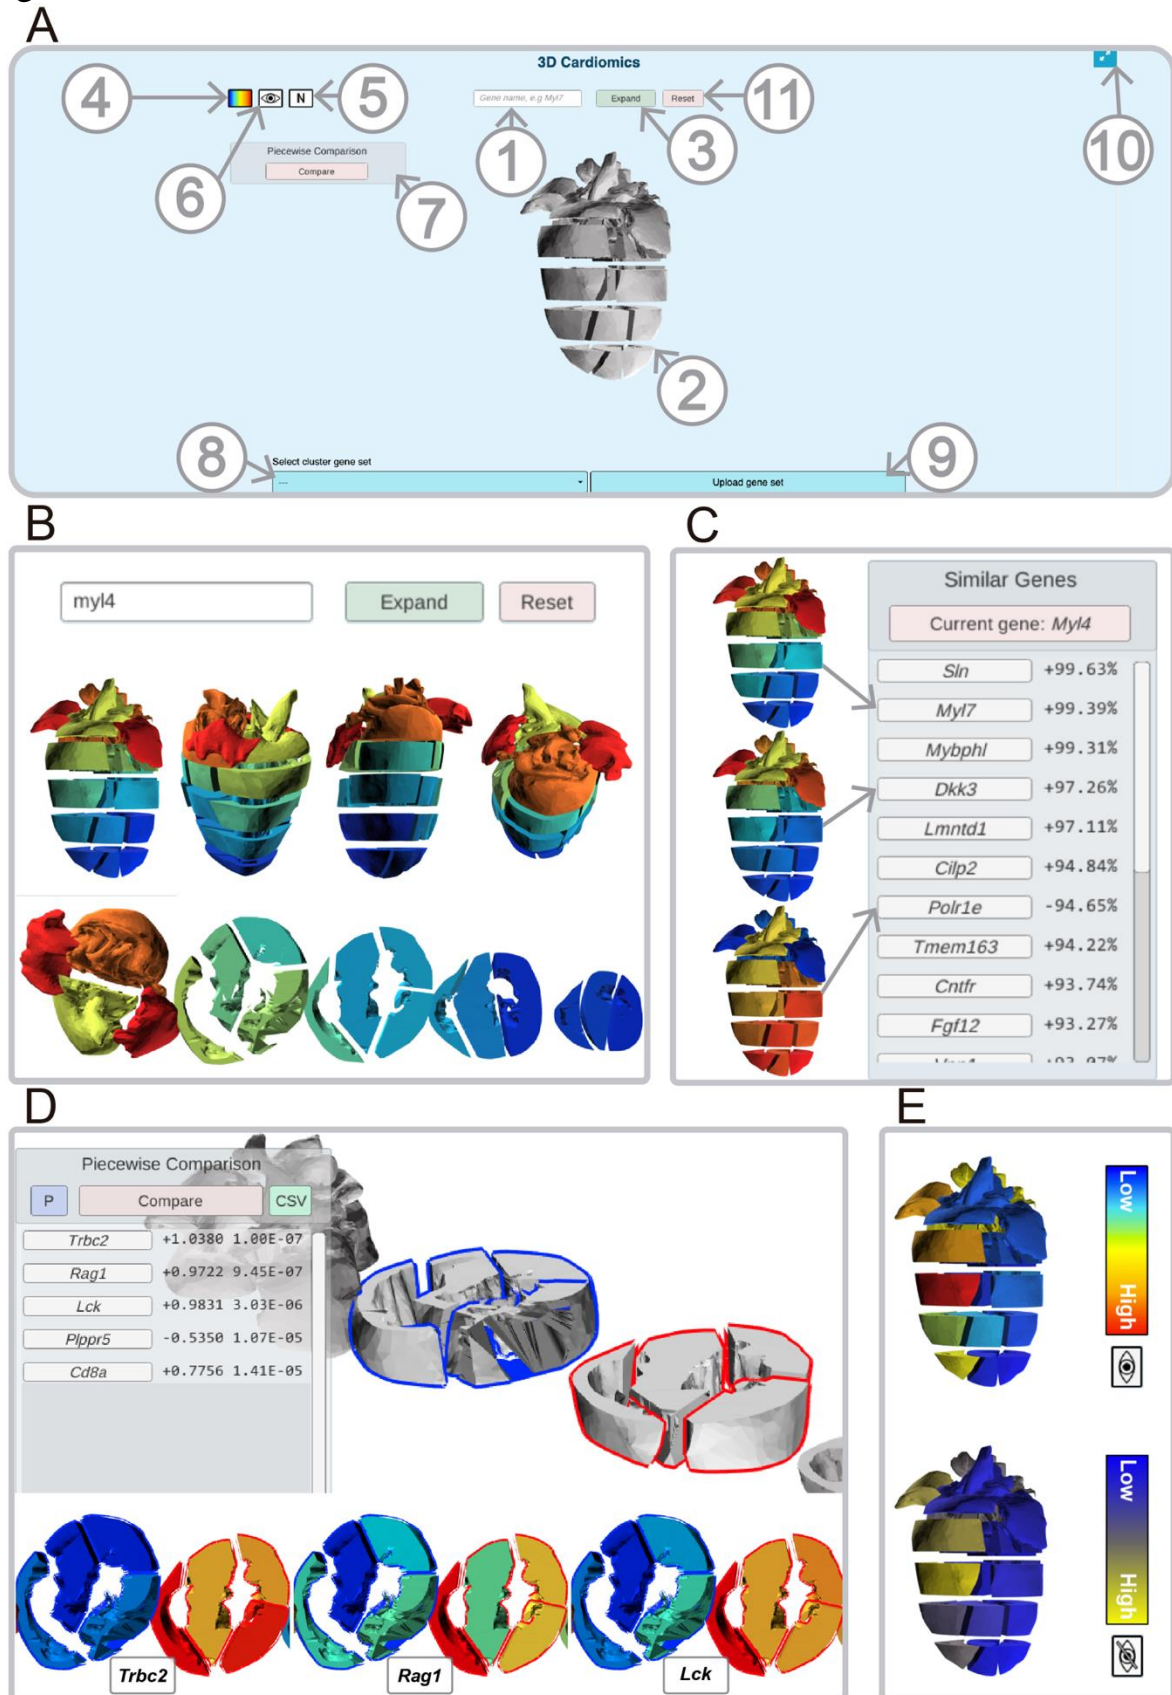

735

736 *Figure 6: The interactive user web interface*

737 A) Guide to components of the interface; 1) Search tool for genes expressed in the heart, for  
738 visualization, 2) 3D heart model, which displays gene expression profile of selected genes, 3)  
739 expand/collapse button for the 3D heart. 4) Colour based scale of gene expression, 5) Button which  
740 enables relative expression, providing a gene score ranging from 0 to 1, 6) color-blind color change  
741 option, 7) Cardiac section selector tool for pairwise differential gene expression, 8) Mean cluster (of  
742 this study) gene expression profile selection tool, 9) upload gene lists to obtain average signal across  
743 the heart, 10) enable full screen, and 11) reset analysis to collapsed heart, clear of gene expression. B)  
744 Visualisation of a selected gene. Top row shows the gene entered into the search bar, middle row  
745 shows different angles of the 3D model with the expression pattern of *Myl4*, bottom row shows the  
746 expanded view of the 3D model. C) Comparison of genes with similar expression patterns. Once a  
747 gene is selected a window appears with a list of genes highly correlated with the gene that was  
748 visualized at the time, with their correlation percentages listed. D) Example of differential gene  
749 expression analysis between ventricular segments A and B. A list of DEGs would appear with their  
750 LFC values and FDR values. ‘CSV’ is an option of downloading the output. When genes are pressed  
751 the expression patterns can be visualized such as the examples shown. E) Visualization of expression  
752 patterns in the different colour formats. Top shows the default, and bottom shows the color-blind  
753 friendly option.

754

755

756

757

758

759

760 Supplementary Figures

761 Supplementary Figure 1

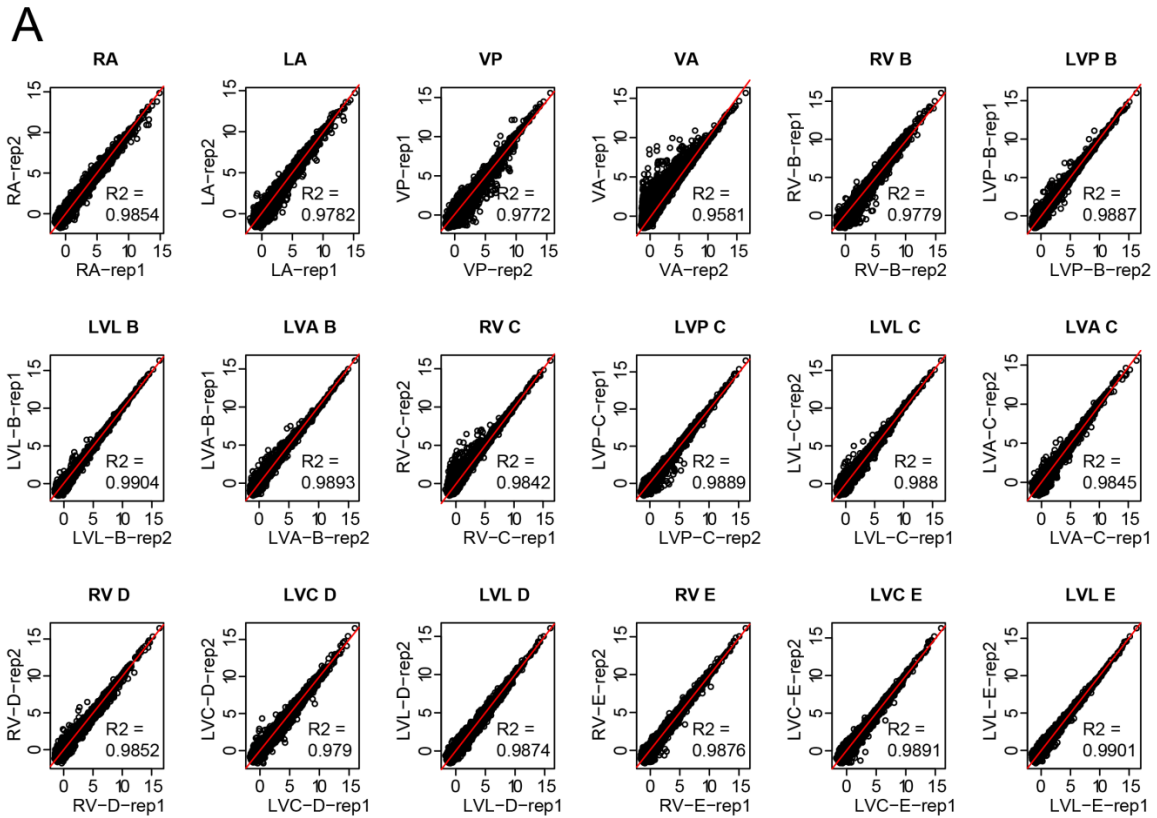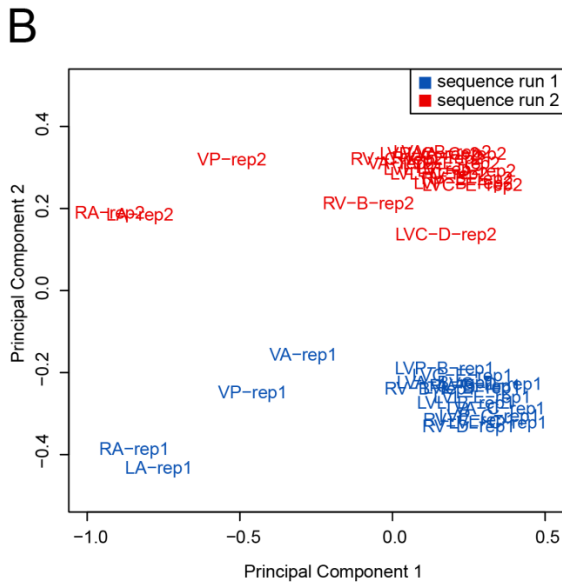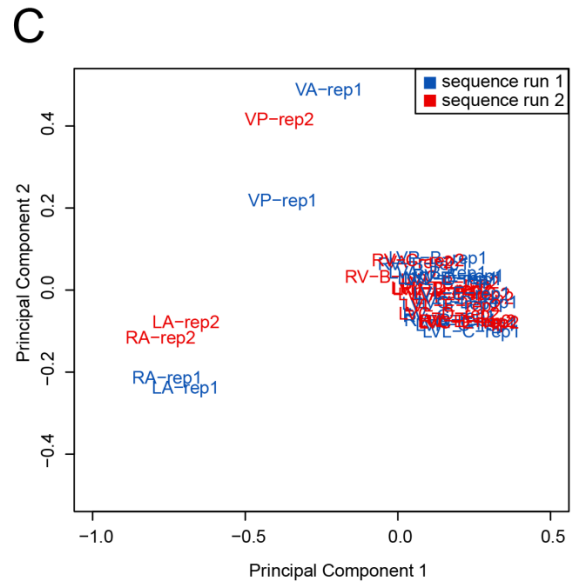

763 *Supplementary figure 1: Replicate correlation measures and batch effect removal*

764 A) The correlation plots of counts of each gene for each of the replicates. B) Principal component  
765 analysis of all samples before batch effect removal and C) after batch effect removal.

766

767

768

769

770

771

772

773

774

775

776

777

778

779

780

781

782

783

784

785

786

787

788 Supplementary figure 2

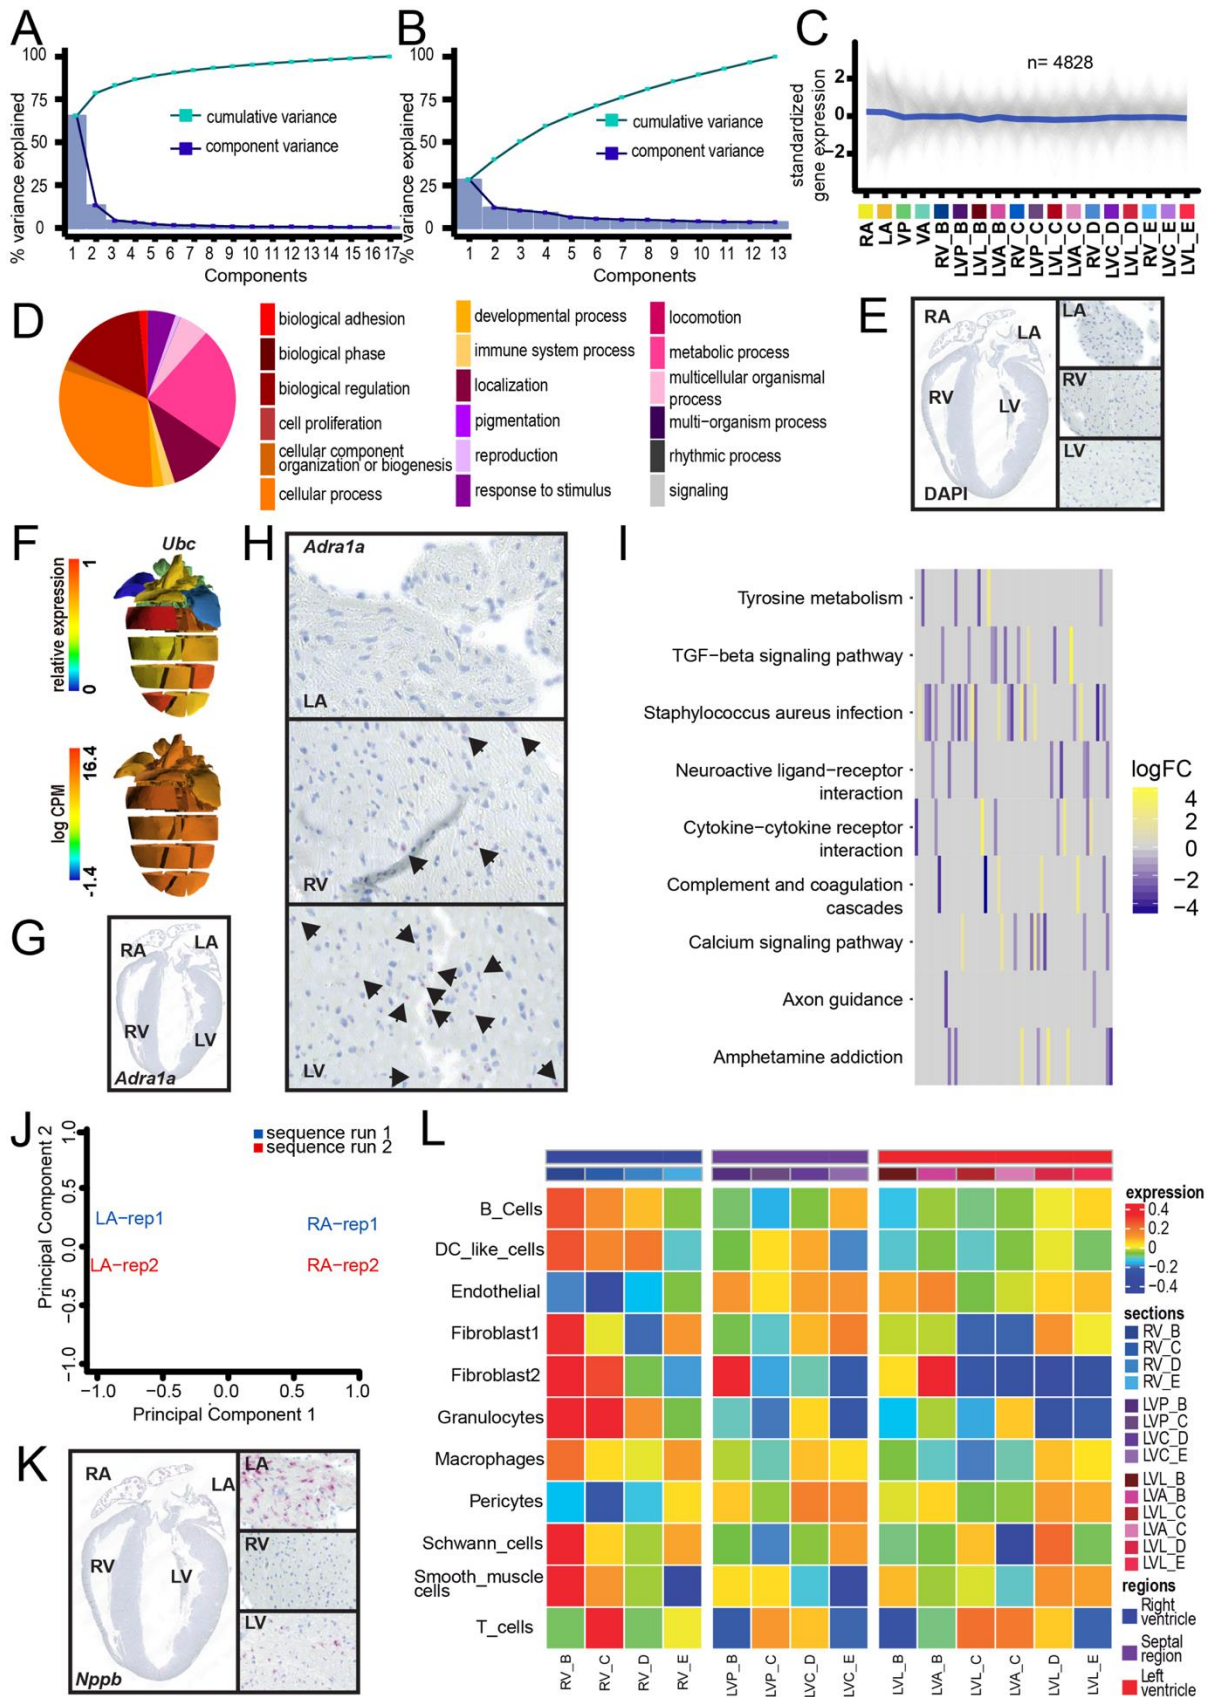

789

790 *Supplementary figure 2*

791 A-C) Variance explained by individual components, and cumulative variance across all components  
792 of correspondence analysis with data of all sections in cpm A), and ventricular sections in cpm B). C)  
793 All genes which had an  $\alpha < 0.7$  in soft cluster analysis and D) the proportions of these genes in  
794 enriched biological processes. E) RNA-scope DAPI control across main cardiac sections at 2.5X (left)  
795 and 10X (right) magnification. F) Relative and log CPM expression of *Ubc*. *Adra1a* expression at  
796 2.5X magnification G), and 10X magnification H) across all cardiac sections. I) KEGG pathway  
797 enrichment heatmap with differentially expressed genes between the left and right atria. J) PCA of  
798 atrial sections and genes found in top enriched molecular functions of DGE analysis between the left  
799 and right atria. K) RNA-scope of *Nppb* expression across main cardiac sections at 2.5X (left) and 10X  
800 (right) magnification. L) Heatmap of average cell type expression across ventricular sections.
